1 **Title**

2 Regenerating insulin-producing  $\beta$ -cells ectopically from a mesodermal origin in the  
3 absence of endothelial specification

4

5 **Author affiliation**

6 Ka-Cheuk Liu<sup>a</sup>, Alethia Villasenor<sup>b</sup>, Nicole Schmitner<sup>a</sup>, Niki Radros<sup>a</sup>, Linn Rautio<sup>a</sup>,  
7 Sven Reischauer<sup>b</sup>, Didier Y.R. Stainier<sup>b</sup>, Olov Andersson<sup>a,\*</sup>

8

9 <sup>a</sup>Department of Cell and Molecular Biology, Karolinska Institutet, 17177 Stockholm,  
10 Sweden

11 <sup>b</sup>Department of Developmental Genetics, Max Planck Institute for Heart and Lung  
12 Research, 61231 Bad Nauheim, Germany

13

14 **\*Corresponding author**

15 Olov Andersson

16 Email: [olov.andersson@ki.se](mailto:olov.andersson@ki.se)

17

18 **Abstract**

19 To investigate the role of the vasculature in pancreatic  $\beta$ -cell regeneration, we crossed  
20 a zebrafish  $\beta$ -cell ablation model into the avascular *npas4l* mutant (i.e. *cloche*).  
21 Surprisingly,  $\beta$ -cell regeneration increased markedly in *npas4l* mutants owing to the  
22 ectopic differentiation of  $\beta$ -cells in the mesenchyme, a phenotype not previously  
23 reported in any models. The ectopic  $\beta$ -cells expressed endocrine markers of  
24 pancreatic  $\beta$ -cells, and also reduced glucose levels in the  $\beta$ -cell ablation model.  
25 Through lineage tracing, we determined that the vast majority of these ectopic  $\beta$ -cells  
26 derived from the mesodermal lineage. Notably, ectopic  $\beta$ -cells were found in *npas4l*  
27 mutants as well as following knockdown of the endothelial determinant Etv2. Together,  
28 these data indicate that in the absence of endothelial specification, mesodermal cells  
29 possess a remarkable plasticity enabling them to form  $\beta$ -cells, which are normally  
30 endodermal in origin. Understanding the restriction of this differentiation plasticity will  
31 help exploit an alternative source for  $\beta$ -cell regeneration.

32

## 33 **Introduction**

34 The concept of embryonic development and cell fate determination was illustrated by  
35 the famous Waddington landscape model decades ago (Waddington, 1957).  
36 Waddington's model not only shows the importance of spatiotemporal precision in cell  
37 differentiation but also metaphorizes cell fate determination as a sequential and  
38 irreversible event. In this hierarchical model, endoderm follows the lineage paths  
39 downwards and progressively differentiates into multiple endodermal cell types,  
40 including pancreatic  $\beta$ -cells. Likewise, mesoderm stays in the mesodermal lineage  
41 paths and differentiates into vasculature and other mesodermal cell types. However,  
42 in recent decades, multiple studies have suggested that committed cells are capable  
43 of differentiating across the germ layer border by converting embryonic and/or adult  
44 mesodermal fibroblasts into ectodermal neuronal cells (Vierbuchen et al., 2010),  
45 multipotent induced neural stem cells (Ring et al., 2012), endodermal hepatocyte-like  
46 cells (Huang et al., 2011; Sekiya & Suzuki, 2011) or pancreatic  $\beta$ -like cells (Zhu et al.,  
47 2016) *in vitro*. These studies highlight the feasibility of converting mesodermal cells  
48 into ectodermal or endodermal cells *in vitro* after the addition of factors.

49 Despite the extensive studies on cell fate conversion across germ layers *in vitro*,  
50 the number of *in vivo* studies is limited. Ectopic expression of *Xsox17 $\beta$*  in *Xenopus*  
51 embryos relocated cells normally fated for ectoderm to appear in the endodermal gut,  
52 suggesting a possible change in cell fate *in vivo* (Clements & Woodland, 2000).  
53 Furthermore, aggregated morulae and chimeric embryos of  $\beta$ -catenin mutants  
54 provided evidence of precardiac mesoderm formation in the endodermal region *in vivo*  
55 (Lickert et al., 2002). Unlike studies expressing ectopic transcription factors or  
56 inducing mutations, the study by Goldman and collaborators revealed endodermal

57 cells differentiating into endothelial cells, which were believed to be mesodermal  
58 derivatives, during normal liver development in lineage-tracing mouse models  
59 (Goldman et al., 2014). These studies suggest that the classical *in vivo* germ layer  
60 border may not be as clear-cut as previously thought.

61 In this study, we aimed to elucidate the importance of the vasculature in  
62 pancreatic  $\beta$ -cell regeneration, which plays a crucial role in potential therapeutic  
63 strategies against diabetes. We employed *cloche* zebrafish mutants as an avascular  
64 model. The mutation of *npas4l*, a master regulator of endothelial and hematopoietic  
65 cell fates, is responsible for the severe loss of most blood vessels and blood cells in  
66 *cloche* mutants (Parker & Stainier, 1999; Reischauer et al., 2016; Stainier et al., 1995).  
67 Unexpectedly, the *npas4l* mutation induced ectopic  $\beta$ -cell formation in the  
68 mesenchymal region outside the pancreas and decreased the glucose level after  $\beta$ -  
69 cell ablation. Lineage-tracing mesodermal cells expressing *draculin (drl)* and *etv2*  
70 validated the mesodermal lineage of the ectopic  $\beta$ -cells, which are normally  
71 endodermal in origin. These findings offer novel insights into cell fate determination  
72 and an alternative source of  $\beta$ -cells.

73



## 74 **Results**

### 75 **Ectopic $\beta$ -cell formation and improved glucose control in *npas4l* mutants**

76 To determine the importance of vasculogenesis and vascularization for  $\beta$ -cell  
77 regeneration, we examined  $\beta$ -cell formation in zebrafish carrying the *cloche* mutation  
78 (*npas4l*<sup>-/-</sup>) after  $\beta$ -cell ablation, i.e., in the *Tg(ins:Flag-*  
79 *NTR);Tg(ins:H2BGFP;ins:DsRed)* model. Nitroreductase (NTR), expressed by the  
80 *insulin* promoter, converts the prodrug metronidazole (MTZ) to a cytotoxin to  
81 specifically ablate insulin-producing  $\beta$ -cells (Curado et al., 2007). The homozygous  
82 mutation of *npas4l* significantly increased the number of *ins:H2BGFP*-positive cells  
83 during the  $\beta$ -cell regeneration period (Figures 1A-C). In addition, we observed a  
84 distinctive ectopic  $\beta$ -cell population in the mesenchymal region outside the pancreas  
85 in the *npas4l*<sup>-/-</sup> group, an ectopic location that was very rarely observed in the sibling  
86 controls (including both wildtype siblings and heterozygous mutants). This ectopic  
87 population of  $\beta$ -cells contributed to the major increase in the number of *ins:H2BGFP*-  
88 positive cells during  $\beta$ -cell regeneration (Figure 1C). Moreover, the comparable and  
89 sparse numbers of *ins:DsRed*-positive cells in the controls and mutants indicate that  
90 the *npas4l* mutation did not enhance the survival of  $\beta$ -cells during the ablation (Figure  
91 1A and B) because the extended maturation time of DsRed (Baird et al., 2000)  
92 restricted the detection of DsRed to the surviving  $\beta$ -cells.

93 To visualise the location of the ectopic  $\beta$ -cells better, we labelled the pancreas  
94 with *ptf1a:GFP* and observed not only a drastic reduction in the pancreas size (Figures  
95 1D, E and Figure 1-figure supplement 1) but also the regeneration of  $\beta$ -cells clearly  
96 outside the *ptf1a*-expressing exocrine pancreas in *npas4l* mutants (Figure 1E). By  
97 labelling the mesenchyme with *hand2:EGFP* (Figure 1F-K), we further revealed that

98 the majority of ectopic  $\beta$ -cells formed in *npas4l* mutants intermingled with  
99 *hand2:EGFP*-positive mesenchymal cells between the pronephros and the pancreas  
100 (Figures 1J and K). In addition, we occasionally observed ectopic  $\beta$ -cells intermingled  
101 with *hand2:EGFP*-positive mesenchymal cells ventral to the pancreas (Figures 1I and  
102 K). Although the ectopic  $\beta$ -cells were located among the mesenchymal cells, they did  
103 not express *hand2:EGFP*.

104 Additionally, we examined the *sst2:RFP*-positive  $\delta$ -cell population in the *npas4l*  
105 mutants and revealed a small but significant increase outside the pancreas after  $\delta$ -cell  
106 ablation (Figure 1-figure supplement 2), suggesting that the effect of homozygous  
107 *npas4l* mutation on ectopic endocrine cell formation is not limited to  $\beta$ -cells, albeit likely  
108 with a preference.

109 We further assessed the functionality and maturity of the ectopic  $\beta$ -cell  
110 population. We measured glucose levels in the control and *npas4l*<sup>-/-</sup> groups with or  
111 without  $\beta$ -cell ablation to examine whether the newly formed  $\beta$ -cells could restore  
112 glucose to a normal level. Without  $\beta$ -cell ablation, the mutation of *npas4l* did not alter  
113 the glucose level, indicating that the *npas4l* mutation does not influence glucose  
114 homeostasis in the basal state (Figure 1L). After  $\beta$ -cell ablation, we observed an  
115 increased level of glucose in the sibling controls, while the homozygous mutation of  
116 *npas4l* resulted in a glucose level comparable to that of the controls without  $\beta$ -cell  
117 ablation, suggesting that the ectopic  $\beta$ -cells induced by the *npas4l* mutation contribute  
118 to restoring a physiological glucose level.

119

120 **The ectopic  $\beta$ -cells co-expressed insulin and endocrine markers in *npas4l***  
121 **mutants**

122 Next, we examined multiple pancreatic endocrine and  $\beta$ -cell markers, including *Isl1*,  
123 *neurod1*, *pdx1*, *mnx1*, *pcsk1* and *ascl1b* (the functional homolog to *Neurog3* in  
124 mammals), to validate the  $\beta$ -cell identity of the ectopic insulin-producing cells. The  
125 majority of ectopic  $\beta$ -cells co-expressed insulin and these markers during  $\beta$ -cell  
126 regeneration (Figure 2). The high co-expression of *pcsk1* (Figures 2R-S and Figure 2-  
127 figure supplement 1), which encodes an enzyme necessary for insulin biosynthesis,  
128 indicates that most of the  $\beta$ -cells in the ectopic population are likely functional.  
129 Consistent with preceding findings in pancreatic  $\beta$ -cells, not all ectopic  $\beta$ -cells  
130 expressed *ascl1b:GFP* (Figures 2V-W and Figure 1-figure supplement 1), which  
131 suggests that *ascl1b* works as a transient endocrine cell fate regulator (Flasse et al.,  
132 2013). In contrast with *Isl1*, *mnx1*, *pcsk1* and *ascl1b*, we observed lower co-expression  
133 levels of *neurod1* and *pdx1* in ectopic  $\beta$ -cells compared with the pancreatic population  
134 in *npas4l* mutants (Figure 2-figure supplement 1). In addition to the reduction in  
135 pancreas size (Figure 1-figure supplement 1), the *pdx1*-expressing pancreatic duct  
136 was also reduced in the *npas4l* mutant (Figure 2-figure supplement 2), indicating that  
137 the pancreas and its duct did not expand to form the ectopic  $\beta$ -cells. These  
138 observations together suggest that the pancreatic and ectopic  $\beta$ -cells are similar, yet  
139 they are two distinct  $\beta$ -cell populations.

140

141 **The ectopic  $\beta$ -cells in *npas4l* mutants and *etv2* morphants were of mesodermal**  
142 **origin**

143 We have previously shown that *npas4l* expression is first initiated in the lateral plate  
144 mesoderm at the tailbud stage by *in situ* hybridization (Reischauer et al., 2016). In this  
145 study, we examined *npas4l* expression at 20 hpf, and found that *npas4l* was severely  
146 reduced in the lateral plate mesoderm in the *npas4l* mutants (Figure 3-figure  
147 supplement 1), whereas normal expression levels were observed in the tailbud and  
148 brain. The cells with reduced *npas4l* expression were still present in the lateral plate  
149 mesoderm as demonstrated by the embryos incubated overnight to further develop  
150 the *npas4l* expression signal (Figure 3-figure supplement 1B'). Because the ectopic  
151  $\beta$ -cells induced by the *npas4l* mutation also resided in the mesenchymal region, and  
152 *npas4l* can act cell-autonomously to affect the hematopoietic and endothelial lineages  
153 (Parker & Stainier, 1999), we hypothesized that the ectopic  $\beta$ -cells originated from a  
154 mesodermal lineage.

155 To determine whether the mesoderm was the origin of the ectopic  $\beta$ -cells, we  
156 genetically traced the mesodermal cells using *drl:CreER<sup>T2</sup>*, a tamoxifen-inducible Cre  
157 transgene driven by a *drl* promoter (Mosimann et al., 2015). The spatial expression  
158 pattern of *drl* in the *npas4l* mutants resembled that in the sibling controls (Figure 3-  
159 figure supplement 2), suggesting that *npas4l* mutation did not induce any ectopic  
160 expression of *drl* to disrupt the lineage-tracing approach. Together with *ubb:loxP-*  
161 *EGFP-STOP-loxP-mCherry (ubi:Switch)* (Mosimann et al., 2011), the *drl*-expressing  
162 mesodermal cells would be labelled in red in  
163 *Tg(drl:CreER<sup>T2</sup>);Tg(ubi:Switch);Tg(ins:Flag-NTR)* (*drl*-tracing) zebrafish larvae after 4-  
164 hydroxytamoxifen (4-OHT) induction (Figure 3A). We treated the transgenic embryos

165 with 4-OHT at 10-12 hours postfertilization (hpf). We chose to label the mesodermal  
166 cells during this period as neither endothelial/hematopoietic cells nor  $\beta$ -cells have  
167 developed at that stage, i.e. to exclude confounding effects of  
168 endothelial/hematopoietic cells or possible ectopic expression of the lineage tracer in  
169 the  $\beta$ -cells of the *npas4l* mutant. To ablate the  $\beta$ -cells, we incubated the 4-OHT-treated  
170 transgenic embryos in MTZ at 1-2 days postfertilization (dpf). We allowed the  $\beta$ -cells  
171 to regenerate for 30 hours before we fixed the larvae at 3 dpf for immunostaining  
172 (Figure 3B).

173 Immunostaining against insulin displayed a normal set of  $\beta$ -cells in the  
174 pancreas of the *drl*-tracing larvae with or without *npas4l* mutation after 30 hours of  
175 regeneration (Figures 3C, E and F). In line with the findings shown in Figure 1, the  
176 *npas4l* mutation induced the formation of ectopic  $\beta$ -cells in the mesenchymal region  
177 (Figures 3D, G and H). Furthermore, 98.9% of the ectopic  $\beta$ -cells in the mesenchymal  
178 region were mCherry-positive (Figures 3H'-H'''), indicating that they derived from the  
179 *drl*-expressing mesodermal cells.

180 With a similar setting, we injected the *drl*-tracing embryos (without any *npas4l*  
181 mutation) with control or *etv2* morpholino at one-cell stage. *Npas4l* is essential for the  
182 expression of *etv2*, which is a key regulator of endothelial cell specification and  
183 vasculogenesis (Reischauer et al., 2016; Sumanas & Lin, 2006). Similar to *npas4l*  
184 mutation, knocking down *etv2* led to the formation of ectopic  $\beta$ -cells (Figures 3I-L''').  
185 The majority of the ectopic  $\beta$ -cells (94.3%) in *etv2* morphants was also lineage-traced  
186 back to the *drl*-expressing mesodermal cells, suggesting that the ectopic  $\beta$ -cell  
187 formation was also of mesodermal origin following *etv2* knockdown.

188

189 **The ectopic  $\beta$ -cells in *etv2* morphants derived from the *etv2*-expressing**  
190 **mesodermal lineage**

191 To confirm the origin of the ectopic  $\beta$ -cell using a different lineage-tracing approach  
192 we generated *Tg(etv2:iCre)* zebrafish, which we then crossed into  
193 *Tg(ubi:Switch);Tg(ins:Flag-NTR)*, labelling *etv2*-expressing mesodermal and  
194 endothelial cells in red (Figure 4A). At the one-cell stage, we injected the *etv2*-tracing  
195 embryos with control or *etv2* morpholinos. After  $\beta$ -cell ablation by MTZ treatment at 1-  
196 2 dpf and  $\beta$ -cell regeneration for 30 hours ectopic  $\beta$ -cells formed in the *etv2* morphants,  
197 and 73.9% of the ectopic  $\beta$ -cells were labelled in red (Figures 4B-E'''), illustrating that  
198 the *etv2*-expressing lineage gave rise to a significant portion of the ectopic  $\beta$ -cells.

199 Moreover, we replaced *ubi:Switch* with *ins:loxP-mCherry-STOP-loxP-H2B-*  
200 *GFP (ins:CSH)* in the *etv2*-tracing zebrafish larvae to directly trace *insulin*-expressing  
201 cells originating from the *etv2*-expressing mesodermal lineage (Figure 4F). The co-  
202 localisation of insulin staining and the nuclear green tracer further confirms the  
203 mesodermal lineage of the ectopic  $\beta$ -cells (Figures 4G-G''').

204 Together, we used several different lineage-tracing models as well as two  
205 different loss of function models, i.e. using either the promoter of *drl* or *etv2* to drive  
206 Cre in either *naps4l* mutants or *etv2* morphants. This suggests that the ectopic  $\beta$ -cell  
207 formation is not restricted to the loss of a specific gene, but rather due to the absence  
208 of endothelial specification.

209

## 210 Discussion

211 In this study, we first examined the role of blood vessels in  $\beta$ -cell regeneration in the  
212 *cloche* zebrafish mutant, which carries a homozygous *npas4l* mutation (Reischauer et  
213 al., 2016). We then unexpectedly revealed  $\beta$ -cells regenerating ectopically in the  
214 mesenchymal area. The ectopic  $\beta$ -cells were likely functional because they expressed  
215 several endocrine and  $\beta$ -cell markers including *Isl1*, *mnx1* and *pcsk1*, and were  
216 capable of restoring glucose levels during  $\beta$ -cell regeneration, although we do not  
217 know if they possess all the features of *bona fide*  $\beta$ -cells. Via *in situ* hybridization,  
218 lineage tracing and confocal microscopy, we successfully traced the origin of the  
219 ectopic  $\beta$ -cells to the mesodermal lineage. A recent study has reported the conversion  
220 of *Etv2*-deficient vascular progenitors into skeletal muscle cells, and highlighted the  
221 plasticity of mesodermal cell fate determination within the same germ layer (Chestnut  
222 et al., 2020). Our data demonstrated the plasticity of  $\beta$ -cell differentiation across the  
223 committed germ layers *in vivo*, i.e., switching from a mesodermal to an endodermal  
224 fate in a regenerative setting, while gastrulation and cell fate commitment in the germ  
225 layers are considered to be irreversible in development. Ectopic pancreata have been  
226 observed before, e.g. in *Hes1* mutant mice (Fukuda et al., 2006; Sumazaki et al., 2004),  
227 although that has been shown to be through an expansion of the pancreas rather than  
228 through changes in cell fate determination across organs or germ layers (Jorgensen  
229 et al., 2018). Our discovery is, to our knowledge, the first demonstration of ectopic  $\beta$ -  
230 cells with a mesodermal origin *in vivo*.

231 The mutated gene in the *cloche* mutant was named *npas4l* because its protein  
232 shares some homology with human NPAS4 (Reischauer et al., 2016). Although  
233 injecting either human *NPAS4* mRNA or zebrafish *npas4l* mRNA into zebrafish *cloche*

234 mutant embryos at the one-cell stage could rescue the mutants, *Npas4* knockout mice  
235 are unlikely to share the same severe vascular and hematopoietic defects as zebrafish  
236 *npas4l* mutants because *Npas4* knockout mice survive to adulthood (Lin et al., 2008).  
237 This discrepancy suggests that other members of the mammalian NPAS protein family  
238 or other proteins may be functionally redundant with NPAS4 in vascular and  
239 hematopoietic development. Mammalian NPAS4 has been shown to have important  
240 cell-autonomous functions in  $\beta$ -cells (Sabatini et al., 2018; Speckmann et al., 2016).  
241 In zebrafish, *npas4a* is the main *npas4* paralog expressed in  $\beta$ -cells (Tarifeno-Saldivia  
242 et al., 2017), meaning that it is unlikely the phenotype we identified early in  
243 development in *npas4l* mutants is related to the functions of *Npas4* in  $\beta$ -cells. Further  
244 studies on NPAS4, related bHLH transcription factors and ETV2 in mammals would  
245 elucidate whether inactivating such factors promotes  $\beta$ -cell formation with or without  
246 significantly perturbing the development of blood cells and vessels. We have shown  
247 that the enhanced differentiation potential in *npas4l* mutants is not limited to  $\beta$ -cell  
248 regeneration, which indicates that *Npas4l* may act as a gate for endodermal pancreatic  
249 cell fates in the mesoderm. Opening this gate in mesodermal cells may convert them  
250 to endodermal cells.

251 In summary, we have shown that the *npas4l* mutation or *etv2* knockdown  
252 induces ectopic regeneration of functional  $\beta$ -cells from the mesoderm. Our findings  
253 suggest a plasticity-potential of the mesodermal cells to differentiate into  $\beta$ -cells and  
254 other endodermal pancreatic cells (Figure 4-figure supplement 1). Further studies on  
255 the restriction of this plasticity would not only increase our understanding of the gating  
256 role of *Npas4l* and *Etv2* in cell fate determination but also help to exploit an alternative  
257 source for  $\beta$ -cell regeneration.



## 258 **Methods**

### 259 *Zebrafish*

260 The following previously published mutant or transgenic zebrafish (*Danio rerio*) lines  
261 were used: *cloche*<sup>S5</sup> (Field et al., 2003) as the *npas4l* mutant, *Tg(ins:Hsa.HIST1H2BJ-*  
262 *GFP;ins:DsRed)*<sup>S960</sup> (Tsuji et al., 2014) abbreviated as *Tg(ins:H2BGFP;ins:DsRed)*,  
263 *Tg(ins:Flag-NTR)*<sup>S950</sup> (Andersson et al., 2012), *Tg(ptf1a:GFP)*<sup>jh1</sup> (Godinho et al., 2005),  
264 *Tg(hand2:EGFP)*<sup>pd24</sup> (Kikuchi et al., 2011), *TgBAC(neurod1:EGFP)*<sup>nl1</sup> (Obholzer et al.,  
265 2008), *Tg(-6.5pdx1:GFP)*<sup>zf6</sup> (Huang et al., 2001), *Tg(mnx1:GFP)*<sup>ml2</sup> (Flanagan-Steet et  
266 al., 2005), *Tg(pcsk1:eGFP)*<sup>K1106</sup> (Lu et al., 2016), *TgBAC(ascl1b:EGFP-2A-Cre-*  
267 *ERT2)*<sup>ulg006Tg</sup> (Ghaye et al., 2015) abbreviated as *Tg(ascl1b:GFP)*, *Tg(-3.5ubb:loxP-*  
268 *EGFP-loxP-mCherry)*<sup>cz1701</sup> (Mosimann et al., 2011) abbreviated as *Tg(ubi:Switch)*,  
269 *Tg(-6.35drl:Cre-ERT2,cryaa:Venus)*<sup>cz3333</sup> (Mosimann et al., 2015) abbreviated as  
270 *Tg(drl:CreER<sup>T2</sup>)* (a generous gift from Christian Mosimann),  
271 *Tg(sst2:NTR,cryaa:Cerulean)*<sup>K1102</sup> (Lu et al., 2016) abbreviated as *Tg(sst2:NTR)*,  
272 *Tg(sst2:RFP)*<sup>gz19</sup> (Li et al., 2009) and *Tg(insulin:loxP-mCherry-STOP-loxP-H2B-GFP;*  
273 *cryaa:Cerulean)*<sup>S934</sup> (Hesselson et al., 2011), which is referred to *Tg(ins:mCherry)* in  
274 Figure 2 and *Tg(ins:CSH)* in Figure 4.

275 The *Tg(etv2:iCre;cryaa:Venus)*<sup>K1114</sup> line was generated by the Tol2 transposon  
276 system and the construct was made by MultiSite Gateway Cloning (Invitrogen). The  
277 amplicon of the -2.3*etv2* promoter was synthesised from zebrafish genomic DNA with  
278 a forward primer 5'-  
279 TATAGGGCGAATTGggtaccTTCAGTAAGCAGACTCCTTCAATCA -3' and a reverse  
280 primer 5'- AGCTGGAGCTCCAccgcggTTCGGCATACTGCTGTTGGAC -3' by  
281 Phusion High-Fidelity DNA Polymerase (Thermo Scientific) as an insert for In-Fusion

282 Cloning (Takara Bio) with p5E-MCS using restriction sites KpnI and SacII to yield p5E-  
283 *etv2*. Subsequently p5E-*etv2*, pME-iCre and p3E-polyA were used for the LR reaction  
284 with the destination vector to generate the construct *etv2:iCre*.

285 Males and females ranging in age from 3 months to 2 years were used for  
286 breeding to obtain new offspring for experiments. Individuals were sorted into the  
287 control sibling group (*npas4l*<sup>+/+</sup> or *npas4l*<sup>+/-</sup>) and the homozygous *npas4l* mutant group  
288 (*npas4l*<sup>-/-</sup>) based on the characteristic pericardial oedema and blood-cell deficit.  
289 Zebrafish larvae were allocated into different experimental groups based on their  
290 phenotypes and genotypes in experiments involving *cloche* mutants. In morpholino  
291 knockdown experiments, zebrafish embryos were randomly assigned to each  
292 experimental condition for injection. Experimental procedures were performed on the  
293 zebrafish from 10 hpf to 3 dpf before the completion of sex determination and gonad  
294 differentiation. All zebrafish, except homozygous *npas4l* mutants and *etv2* morphants,  
295 appeared healthy and survived to adulthood. The homozygous *npas4l* mutants  
296 exhibited pericardial oedema, bell-shaped hearts and blood deficits, as previously  
297 reported (Stainier et al., 1995). The *etv2* morphants had similar phenotypes. All studies  
298 involving zebrafish were performed in accordance with local guidelines and  
299 regulations, and approved by regional authorities.

300

### 301 *Chemical ablation of $\beta$ - and $\delta$ -cells*

302 As in our previous report (Schulz et al., 2016), we ablated  $\beta$ -cells and  $\delta$ -cells by  
303 incubating the  $\beta$ -cell ablation model *Tg(ins:Flag-NTR)* zebrafish and the  $\delta$ -cell ablation  
304 model *Tg(sst2:NTR)* zebrafish in E3 medium supplemented with 10 mM metronidazole

305 (MTZ, Sigma-Aldrich), 1% DMSO (VWR) and 0.2 mM 1-phenyl-2-thiourea (Acros  
306 Organics) for 24 h from 1 to 2 dpf.

307

### 308 *Microinjection of morpholinos*

309 Standard control morpholino (5'-CCTCTTACCTCAGTTACAATTTATA-3') and *etv2*  
310 morpholino (5'-CACTGAGTCCTTATTTCACTATATC-3') (Sumanas & Lin, 2006) were  
311 purchased from Gene Tools, LLC and 4ng of each was injected into one-cell stage  
312 zebrafish embryos.

313

### 314 *Lineage tracing by tamoxifen-inducible Cre recombinase*

315 To genetically trace the mesodermal lineage, we treated *Tg(ins:Flag-*  
316 *NTR);Tg(ubi:Switch);Tg(drl:CreER<sup>T2</sup>)* zebrafish embryos with 10  $\mu$ M 4-OHT (Sigma-  
317 Aldrich) in E3 medium in 90-mm Petri dishes, with approximately 60 individuals per  
318 dish, from 10 to 12 hpf. Upon induction by 4-OHT, cytoplasmic CreER<sup>T2</sup> would be  
319 translocated to the nucleus to excise the loxP-flanked EGFP to enable mCherry  
320 expression in *drl*-expressing cells and their descendants, indicating a mesodermal  
321 lineage.

322

### 323 *Sample fixation for immunostaining*

324 Before fixing the zebrafish larvae, we confirmed the presence of the transgenes by  
325 determining the corresponding fluorescent markers and subsequently examined them  
326 under a widefield fluorescence microscope LEICA M165 FC (Leica Microsystems).  
327 We then euthanized the zebrafish larvae with 250 mg/L tricaine (Sigma-Aldrich) in E3  
328 medium followed by washing in distilled water three times. We fixed the samples in

329 4% formaldehyde (Sigma-Aldrich) in PBS (ThermoFisher Scientific) at 4 °C overnight.  
330 After washing away the fixative with PBS three times, we removed the skin and  
331 crystallized yolk of the zebrafish larvae by forceps under the microscope to expose  
332 the pancreas and mesenchyme for immunostaining.

333

### 334 *Immunostaining and confocal imaging*

335 As in our previous report (Liu et al., 2018), we started immunostaining by incubating  
336 the zebrafish samples in blocking solution (0.3% Triton X-100, 4% BSA and 0.02%  
337 sodium azide from Sigma-Aldrich in PBS) at room temperature for one hour. We then  
338 incubated the samples in blocking solution with primary antibodies at 4 °C overnight.  
339 After removing the primary antibodies, we washed the samples with washing buffer  
340 (0.3% Triton X-100 in PBS) eight times at room temperature for two hours. Afterwards,  
341 we incubated the samples in blocking solution with fluorescent dye-conjugated  
342 secondary antibodies and the nuclear counterstain DAPI (ThermoFisher Scientific) if  
343 applicable at 4 °C overnight. Next, we removed the secondary antibodies and nuclear  
344 counterstain and washed the samples with washing buffer eight times at room  
345 temperature for two hours. The following primary antibodies were used: anti-GFP  
346 (1:500, Aves Labs, GFP-1020), anti-RFP (1:500, Abcam, ab62341), anti-insulin (1:100,  
347 Cambridge Research Biochemicals, customised), anti-pan-cadherin (1:5000, Sigma,  
348 C3678) and anti-islet-1-homeobox (1:10, DSHB, 40.3A4 supernatant).

349 Before confocal imaging, we mounted the stained samples in VECTASHIELD  
350 Antifade Mounting Medium (Vector Laboratories) on microscope slides with the  
351 pancreas facing the cover slips. We imaged the pancreas and the neighbouring

352 mesenchyme of every zebrafish sample that we had mounted with the confocal laser  
353 scanning microscopy platform Leica TCS SP8 (Leica Microsystems).

354

#### 355 *Determination of free glucose level in zebrafish*

356 To collect the samples, we washed the zebrafish larvae in PBS and transferred them  
357 to individual tubes, with 5 larvae per tube, for snap freezing in liquid nitrogen.  
358 Afterwards, we added a 5-mm stainless steel bead (QIAGEN) and 100  $\mu$ l of PBS to  
359 each tube and lysed the samples by TissueLyser II (QIAGEN) at 4 °C for 2 min. After  
360 centrifugation, we transferred the supernatant to another tube for further analysis.

361 We employed the Glucose Colorimetric/Fluorometric Assay Kit (BioVision) to  
362 measure the free glucose level in the zebrafish larvae according to the manufacturer's  
363 protocol. First, we prepared a glucose standard at 0, 0.1, 0.2, 0.4 and 0.8 nmol in 25  
364  $\mu$ l of glucose assay buffer in a 96-well microplate for the standard curve. We then  
365 transferred 5  $\mu$ l of the sample supernatant from each sample tube together with 20  $\mu$ l  
366 of glucose assay buffer to the microplate. Subsequently, we prepared the glucose  
367 reaction mix consisting of 24.8  $\mu$ l of glucose assay buffer, 0.1  $\mu$ l of glucose probe and  
368 0.1  $\mu$ l of glucose enzyme mix for each reaction. After adding 25  $\mu$ l of glucose reaction  
369 mix to each reaction, we incubated the microplate at 37 °C in the dark for 30 min.  
370 Finally, we measured the fluorescence intensity emitted from the reactions with the  
371 FLUOstar OPTIMA microplate reader (BMG LABTECH) at Ex/Em = 535/590 nm.

372

#### 373 *Whole-mount in situ hybridization*

374 Zebrafish embryos at 10 and 20 dpf were fixed with 4% paraformaldehyde in PBS at  
375 4 °C overnight. Whole-mount *in situ* hybridization was performed according to the

376 method in a previous report (Thisse & Thisse, 2008). Probes against *npas4l* and *drl*  
377 were synthesised from PCR-products using bud-stage zebrafish cDNA, Phusion High-  
378 Fidelity DNA Polymerase (Thermo Scientific) and primer pairs 5'-  
379 ACTCGGGCATCAGGAGGATC-3' plus 5'-  
380 (CCTAATACGACTCACTATAGGG)GACACCAGCATACGACACACAAC-3' for  
381 *npas4l*, and 5'- ATGAAGAATACAACAAAACCC-3' plus 5'-  
382 (CCTAATACGACTCACTATAGGG)TGAGAAGCTCTGGCCGC-3' for *drl*, respectively,  
383 T7 was employed for transcription, and digoxigenin (Roche) was used for labelling. To  
384 genotype the *npas4l* mutants, PCR was performed using gDNA from the imaged  
385 samples and primers 5'- TTCCATCTTCTGAATCCTCCA-3' plus 5'-  
386 GGACAGACCCAGATACTCGT-3' at the conditions previously reported (Reischauer  
387 et al., 2016). The PCR products were then sent for sequencing with a primer 5'-  
388 TTTCTGCCGTGAATGGATGTG-3' (Eurofins Genomics).

389

### 390 *Statistical analysis*

391 Similar experiments were performed at least two times independently. The number of  
392 cells in the confocal microscopy images were all quantified manually with the aid of  
393 the Multipoint Tool from ImageJ. Data were then analysed with Prism (GraphPad).  
394 Statistical analyses were carried out by two-tailed *t*-tests when two groups were  
395 analysed and by ANOVA when more than two groups were analysed. We have  
396 presented the results as the mean values  $\pm$  SEM and considered *P* values  $\leq$  0.05 to  
397 be statistically significant. The *n* number represents the number of zebrafish  
398 individuals in each group of each experiment.

399

400 **Acknowledgments**

401 Research in the lab of O.A. was supported by funding from the European Research  
402 Council under the Horizon 2020 research and innovation programme (grant n°  
403 772365); the Swedish Research Council; the Novo Nordisk Foundation; Ragnar  
404 Söderberg's Foundation; and the Strategic Research Programmes in Diabetes, and  
405 Stem Cells & Regenerative Medicine at the Karolinska Institutet. This work was also  
406 supported by an EFSD/Lilly Fellowship awarded to K.C.L.

407

408 **Competing interests**

409 The authors declare no competing interests.

410

411 **References**

412 Andersson, O., Adams, B. A., Yoo, D., Ellis, G. C., Gut, P., Anderson, R. M.,  
413 German, M. S., & Stainier, D. Y. (2012, Jun 6). Adenosine signaling promotes  
414 regeneration of pancreatic  $\beta$  cells in vivo. *Cell Metab*, 15(6), 885-894.  
415 <https://doi.org/10.1016/j.cmet.2012.04.018>

416  
417 Baird, G. S., Zacharias, D. A., & Tsien, R. Y. (2000, Oct 24). Biochemistry,  
418 mutagenesis, and oligomerization of DsRed, a red fluorescent protein from  
419 coral. *Proc Natl Acad Sci U S A*, 97(22), 11984-11989.  
420 <https://doi.org/10.1073/pnas.97.22.11984>

421  
422 Chestnut, B., Casie Chetty, S., Koenig, A. L., & Sumanas, S. (2020, Jun 3). Single-  
423 cell transcriptomic analysis identifies the conversion of zebrafish Etv2-  
424 deficient vascular progenitors into skeletal muscle. *Nat Commun*, 11(1), 2796.  
425 <https://doi.org/10.1038/s41467-020-16515-y>

426  
427 Clements, D., & Woodland, H. R. (2000, Dec). Changes in embryonic cell fate  
428 produced by expression of an endodermal transcription factor, Xsox17. *Mech*  
429 *Dev*, 99(1-2), 65-70. [https://doi.org/10.1016/S0925-4773\(00\)00476-7](https://doi.org/10.1016/S0925-4773(00)00476-7)

430  
431 Curado, S., Anderson, R. M., Jungblut, B., Mumm, J., Schroeter, E., & Stainier, D. Y.  
432 (2007, Apr). Conditional targeted cell ablation in zebrafish: a new tool for  
433 regeneration studies. *Dev Dyn*, 236(4), 1025-1035.  
434 <https://doi.org/10.1002/dvdy.21100>

435



- 436 Field, H. A., Dong, P. D., Beis, D., & Stainier, D. Y. (2003, Sep 1). Formation of the  
437 digestive system in zebrafish. II. Pancreas morphogenesis. *Dev Biol*, 261(1),  
438 197-208. [https://doi.org/10.1016/S0012-1606\(03\)00308-7](https://doi.org/10.1016/S0012-1606(03)00308-7)  
439
- 440 Flanagan-Steet, H., Fox, M. A., Meyer, D., & Sanes, J. R. (2005, Oct).  
441 Neuromuscular synapses can form in vivo by incorporation of initially aneural  
442 postsynaptic specializations. *Development*, 132(20), 4471-4481.  
443 <https://doi.org/10.1242/dev.02044>  
444
- 445 Flasse, L. C., Pirson, J. L., Stern, D. G., Von Berg, V., Manfroid, I., Peers, B., & Voz,  
446 M. L. (2013, Jul 8). Ascl1b and Neurod1, instead of Neurog3, control  
447 pancreatic endocrine cell fate in zebrafish. *BMC Biol*, 11, 78.  
448 <https://doi.org/10.1186/1741-7007-11-78>  
449
- 450 Fukuda, A., Kawaguchi, Y., Furuyama, K., Kodama, S., Horiguchi, M., Kuhara, T.,  
451 Koizumi, M., Boyer, D. F., Fujimoto, K., Doi, R., Kageyama, R., Wright, C. V.,  
452 & Chiba, T. (2006, Jun). Ectopic pancreas formation in Hes1 -knockout mice  
453 reveals plasticity of endodermal progenitors of the gut, bile duct, and  
454 pancreas. *J Clin Invest*, 116(6), 1484-1493. <https://doi.org/10.1172/JCI27704>  
455
- 456 Ghaye, A. P., Bergemann, D., Tarifeno-Saldivia, E., Flasse, L. C., Von Berg, V.,  
457 Peers, B., Voz, M. L., & Manfroid, I. (2015, Sep 2). Progenitor potential of  
458 nkx6.1-expressing cells throughout zebrafish life and during beta cell  
459 regeneration. *BMC Biol*, 13, 70. <https://doi.org/10.1186/s12915-015-0179-4>  
460

- 461 Godinho, L., Mumm, J. S., Williams, P. R., Schroeter, E. H., Koerber, A., Park, S. W.,  
462 Leach, S. D., & Wong, R. O. (2005, Nov). Targeting of amacrine cell neurites  
463 to appropriate synaptic laminae in the developing zebrafish retina.  
464 *Development*, 132(22), 5069-5079. <https://doi.org/10.1242/dev.02075>  
465
- 466 Goldman, O., Han, S., Hamou, W., Jodon de Villeroche, V., Uzan, G., Lickert, H., &  
467 Gouon-Evans, V. (2014, Oct 14). Endoderm generates endothelial cells  
468 during liver development. *Stem Cell Reports*, 3(4), 556-565.  
469 <https://doi.org/10.1016/j.stemcr.2014.08.009>  
470
- 471 Hesselton, D., Anderson, R. M., & Stainier, D. Y. (2011, Apr 26). Suppression of  
472 Ptf1a activity induces acinar-to-endocrine conversion. *Curr Biol*, 21(8), 712-  
473 717. <https://doi.org/10.1016/j.cub.2011.03.041>  
474
- 475 Huang, H., Vogel, S. S., Liu, N., Melton, D. A., & Lin, S. (2001, May 25). Analysis of  
476 pancreatic development in living transgenic zebrafish embryos. *Mol Cell*  
477 *Endocrinol*, 177(1-2), 117-124. [https://doi.org/10.1016/s0303-7207\(01\)00408-](https://doi.org/10.1016/s0303-7207(01)00408-7)  
478 [7](https://doi.org/10.1016/s0303-7207(01)00408-7)  
479
- 480 Huang, P., He, Z., Ji, S., Sun, H., Xiang, D., Liu, C., Hu, Y., Wang, X., & Hui, L.  
481 (2011, May 11). Induction of functional hepatocyte-like cells from mouse  
482 fibroblasts by defined factors. *Nature*, 475(7356), 386-389.  
483 <https://doi.org/10.1038/nature10116>  
484

- 485 Jorgensen, M. C., de Lichtenberg, K. H., Collin, C. A., Klinck, R., Ekberg, J. H.,  
486 Engelstoff, M. S., Lickert, H., & Serup, P. (2018, Sep 3). Neurog3-dependent  
487 pancreas dysgenesis causes ectopic pancreas in Hes1 mutant mice.  
488 *Development*, 145(17). <https://doi.org/10.1242/dev.163568>  
489
- 490 Kikuchi, K., Holdway, J. E., Major, R. J., Blum, N., Dahn, R. D., Begemann, G., &  
491 Poss, K. D. (2011, Mar 15). Retinoic acid production by endocardium and  
492 epicardium is an injury response essential for zebrafish heart regeneration.  
493 *Dev Cell*, 20(3), 397-404. <https://doi.org/10.1016/j.devcel.2011.01.010>  
494
- 495 Li, Z., Wen, C., Peng, J., Korzh, V., & Gong, Z. (2009, Feb). Generation of living  
496 color transgenic zebrafish to trace somatostatin-expressing cells and  
497 endocrine pancreas organization. *Differentiation*, 77(2), 128-134.  
498 <https://doi.org/10.1016/j.diff.2008.09.014>  
499
- 500 Lickert, H., Kutsch, S., Kanzler, B., Tamai, Y., Taketo, M. M., & Kemler, R. (2002,  
501 Aug). Formation of multiple hearts in mice following deletion of  $\beta$ -*catenin* in  
502 the embryonic endoderm. *Dev Cell*, 3(2), 171-181.  
503 [https://doi.org/10.1016/S1534-5807\(02\)00206-X](https://doi.org/10.1016/S1534-5807(02)00206-X)  
504
- 505 Lin, Y., Bloodgood, B. L., Hauser, J. L., Lapan, A. D., Koon, A. C., Kim, T. K., Hu, L.  
506 S., Malik, A. N., & Greenberg, M. E. (2008, Oct 30). Activity-dependent  
507 regulation of inhibitory synapse development by Npas4. *Nature*, 455(7217),  
508 1198-1204. <https://doi.org/10.1038/nature07319>  
509

- 510 Liu, K. C., Leuckx, G., Sakano, D., Seymour, P. A., Mattsson, C. L., Rautio, L.,  
511 Staels, W., Verdonck, Y., Serup, P., Kume, S., Heimberg, H., & Andersson, O.  
512 (2018, Jan). Inhibition of Cdk5 Promotes  $\beta$ -Cell Differentiation From Ductal  
513 Progenitors. *Diabetes*, 67(1), 58-70. <https://doi.org/10.2337/db16-1587>  
514
- 515 Lu, J., Liu, K. C., Schulz, N., Karampelias, C., Charbord, J., Hilding, A., Rautio, L.,  
516 Bertolino, P., Ostenson, C. G., Brismar, K., & Andersson, O. (2016, Sep 15).  
517 IGFBP1 increases  $\beta$ -cell regeneration by promoting  $\alpha$ - to  $\beta$ -cell  
518 transdifferentiation. *EMBO J*, 35(18), 2026-2044.  
519 <https://doi.org/10.15252/emj.201592903>  
520
- 521 Mosimann, C., Kaufman, C. K., Li, P., Pugach, E. K., Tamplin, O. J., & Zon, L. I.  
522 (2011, Jan). Ubiquitous transgene expression and Cre-based recombination  
523 driven by the ubiquitin promoter in zebrafish. *Development*, 138(1), 169-177.  
524 <https://doi.org/10.1242/dev.059345>  
525
- 526 Mosimann, C., Panakova, D., Werdich, A. A., Musso, G., Burger, A., Lawson, K. L.,  
527 Carr, L. A., Nevis, K. R., Sabeh, M. K., Zhou, Y., Davidson, A. J., DiBiase, A.,  
528 Burns, C. E., Burns, C. G., MacRae, C. A., & Zon, L. I. (2015, Aug 26).  
529 Chamber identity programs drive early functional partitioning of the heart. *Nat*  
530 *Commun*, 6, 8146. <https://doi.org/10.1038/ncomms9146>  
531
- 532 Obholzer, N., Wolfson, S., Trapani, J. G., Mo, W., Nechiporuk, A., Busch-Nentwich,  
533 E., Seiler, C., Sidi, S., Sollner, C., Duncan, R. N., Boehland, A., & Nicolson, T.  
534 (2008, Feb 27). Vesicular glutamate transporter 3 is required for synaptic

535 transmission in zebrafish hair cells. *J Neurosci*, 28(9), 2110-2118.

536 <https://doi.org/10.1523/JNEUROSCI.5230-07.2008>

537

538 Parker, L., & Stainier, D. Y. (1999, Jun). Cell-autonomous and non-autonomous  
539 requirements for the zebrafish gene *cloche* in hematopoiesis. *Development*,  
540 126(12), 2643-2651.

541

542 Reischauer, S., Stone, O. A., Villasenor, A., Chi, N., Jin, S. W., Martin, M., Lee, M.  
543 T., Fukuda, N., Marass, M., Witty, A., Fiddes, I., Kuo, T., Chung, W. S., Salek,  
544 S., Lerrigo, R., Alsio, J., Luo, S., Tworus, D., Augustine, S. M., Muceniekis, S.,  
545 Nystedt, B., Giraldez, A. J., Schroth, G. P., Andersson, O., & Stainier, D. Y.  
546 (2016, Jul 14). *Cloche* is a bHLH-PAS transcription factor that drives  
547 haemato-vascular specification. *Nature*, 535(7611), 294-298.

548 <https://doi.org/10.1038/nature18614>

549

550 Ring, K. L., Tong, L. M., Balestra, M. E., Javier, R., Andrews-Zwilling, Y., Li, G.,  
551 Walker, D., Zhang, W. R., Kreitzer, A. C., & Huang, Y. (2012, Jul 6). Direct  
552 reprogramming of mouse and human fibroblasts into multipotent neural stem  
553 cells with a single factor. *Cell Stem Cell*, 11(1), 100-109.

554 <https://doi.org/10.1016/j.stem.2012.05.018>

555

556 Sabatini, P. V., Speckmann, T., Nian, C., Glavas, M. M., Wong, C. K., Yoon, J. S.,  
557 Kin, T., Shapiro, A. M. J., Gibson, W. T., Verchere, C. B., & Lynn, F. C. (2018,  
558 Jan 2). Neuronal PAS Domain Protein 4 Suppression of Oxygen Sensing

- 559 Optimizes Metabolism during Excitation of Neuroendocrine Cells. *Cell Rep*,  
560 22(1), 163-174. <https://doi.org/10.1016/j.celrep.2017.12.033>  
561
- 562 Schulz, N., Liu, K. C., Charbord, J., Mattsson, C. L., Tao, L., Tworus, D., &  
563 Andersson, O. (2016, Nov). Critical role for adenosine receptor A2a in  $\beta$ -cell  
564 proliferation. *Mol Metab*, 5(11), 1138-1146.  
565 <https://doi.org/10.1016/j.molmet.2016.09.006>  
566
- 567 Sekiya, S., & Suzuki, A. (2011, Jun 29). Direct conversion of mouse fibroblasts to  
568 hepatocyte-like cells by defined factors. *Nature*, 475(7356), 390-393.  
569 <https://doi.org/10.1038/nature10263>  
570
- 571 Speckmann, T., Sabatini, P. V., Nian, C., Smith, R. G., & Lynn, F. C. (2016, Feb 5).  
572 Npas4 Transcription Factor Expression Is Regulated by Calcium Signaling  
573 Pathways and Prevents Tacrolimus-induced Cytotoxicity in Pancreatic Beta  
574 Cells. *J Biol Chem*, 291(6), 2682-2695.  
575 <https://doi.org/10.1074/jbc.M115.704098>  
576
- 577 Stainier, D. Y., Weinstein, B. M., Detrich, H. W., 3rd, Zon, L. I., & Fishman, M. C.  
578 (1995, Oct). Cloche, an early acting zebrafish gene, is required by both the  
579 endothelial and hematopoietic lineages. *Development*, 121(10), 3141-3150.  
580
- 581 Sumanas, S., & Lin, S. (2006, Jan). Ets1-related protein is a key regulator of  
582 vasculogenesis in zebrafish. *PLoS Biol*, 4(1), e10.  
583 <https://doi.org/10.1371/journal.pbio.0040010>

584

585 Sumazaki, R., Shiojiri, N., Isoyama, S., Masu, M., Keino-Masu, K., Osawa, M.,  
586 Nakauchi, H., Kageyama, R., & Matsui, A. (2004, Jan). Conversion of biliary  
587 system to pancreatic tissue in Hes1-deficient mice. *Nat Genet*, 36(1), 83-87.  
588 <https://doi.org/10.1038/ng1273>

589

590 Tarifeno-Saldivia, E., Lavergne, A., Bernard, A., Padamata, K., Bergemann, D., Voz,  
591 M. L., Manfroid, I., & Peers, B. (2017, Mar 21). Transcriptome analysis of  
592 pancreatic cells across distant species highlights novel important regulator  
593 genes. *BMC Biol*, 15(1), 21. <https://doi.org/10.1186/s12915-017-0362-x>

594

595 Thisse, C., & Thisse, B. (2008). High-resolution in situ hybridization to whole-mount  
596 zebrafish embryos. *Nat Protoc*, 3(1), 59-69.  
597 <https://doi.org/10.1038/nprot.2007.514>

598

599 Tsuji, N., Ninov, N., Delawary, M., Osman, S., Roh, A. S., Gut, P., & Stainier, D. Y.  
600 (2014). Whole organism high content screening identifies stimulators of  
601 pancreatic beta-cell proliferation. *PLoS One*, 9(8), e104112.  
602 <https://doi.org/10.1371/journal.pone.0104112>

603

604 Vierbuchen, T., Ostermeier, A., Pang, Z. P., Kokubu, Y., Sudhof, T. C., & Wernig, M.  
605 (2010, Feb 25). Direct conversion of fibroblasts to functional neurons by  
606 defined factors. *Nature*, 463(7284), 1035-1041.  
607 <https://doi.org/10.1038/nature08797>

608

609 Waddington, C. H. (1957). *The strategy of the genes; a discussion of some aspects*  
610 *of theoretical biology*. Allen & Unwin.

611

612 Zhu, S., Russ, H. A., Wang, X., Zhang, M., Ma, T., Xu, T., Tang, S., Hebrok, M., &  
613 Ding, S. (2016, Jan 6). Human pancreatic beta-like cells converted from  
614 fibroblasts. *Nat Commun*, 7, 10080. <https://doi.org/10.1038/ncomms10080>

615

616



617 **Figure Legends**

618 **Figure 1. Ectopic  $\beta$ -cell formation and improved glucose control in *npas4l***  
619 **mutants**

620 **(A and B)** Representative confocal projections of the pancreas and the neighbouring  
621 tissues of control siblings and *npas4l*<sup>-/-</sup> *Tg(ins:Flag-NTR);Tg(ins:H2BGFP;ins:DsRed)*  
622 zebrafish larvae at 3 dpf after  $\beta$ -cell ablation by MTZ at 1-2 dpf, displaying regenerated  
623  $\beta$ -cells in green and older  $\beta$ -cells that likely survived the ablation in yellow overlap  
624 (arrowheads). The ectopic  $\beta$ -cells are indicated by the white dashed rectangle.  
625 Pancreata are outlined by the solid white lines. **(C)** Quantification of the pancreatic or  
626 ectopic  $\beta$ -cells per larva at 3 dpf. \*\*\*\* $P < 0.0001$  (Šidák's multiple comparisons test);  
627  $n = 24$  (control) and 19 (*npas4l*<sup>-/-</sup>). **(D and E)** Representative image projections of the  
628 pancreas and the neighbouring tissues in control siblings and *npas4l*<sup>-/-</sup> *Tg(ins:Flag-*  
629 *NTR);Tg(ptf1a:GFP)* larvae at 3 dpf after  $\beta$ -cell ablation by MTZ at 1-2 dpf, displaying  
630 insulin-expressing  $\beta$ -cells in red and exocrine pancreas in green. The dashed  
631 rectangle indicates ectopic  $\beta$ -cells in the mesenchyme **(E)**. **(F-K)** Representative  
632 images and projections of the pancreas and the neighbouring mesenchyme of control  
633 siblings and *npas4l*<sup>-/-</sup> *Tg(ins:Flag-NTR);Tg(hand2:EGFP)* zebrafish larvae at 3 dpf  
634 after  $\beta$ -cell ablation by MTZ at 1-2 dpf, displaying  $\beta$ -cells in red and *hand2:EGFP*<sup>+</sup>  
635 mesenchyme in green. White arrowheads point to  $\beta$ -cells in the pancreas **(F and I)**.  
636 Dashed rectangles indicate the ectopic  $\beta$ -cells intermingling with the mesenchyme  
637 between the pronephros and the pancreas, without co-expressing insulin and  
638 *hand2:EGFP* **(J and K)**. Selected area in dashed ovals shows the ectopic  $\beta$ -cells  
639 intermingling with the mesenchyme ventral to the pancreas **(I and K)**. **(L)** Glucose  
640 levels of control siblings and *npas4l*<sup>-/-</sup> larvae at 3 dpf after  $\beta$ -cell ablation at 1-2 dpf.

641 Free-glucose levels of larvae without ablating the  $\beta$ -cells are shown as the baseline  
642 reference. \*\*\*\* $P < 0.0001$  (Šidák's multiple comparisons test);  $n = 80$  larvae (16 groups  
643 of 5 pooled larvae) per data column. Quantification data are represented as the mean  
644  $\pm$  SEM. Scale bars = 20  $\mu$ m. Anatomical axes: D (dorsal), V (ventral), A (anterior) and  
645 P (posterior).

646

647 **Figure 2. The ectopic  $\beta$ -cells co-expressed insulin and endocrine markers in**  
648 ***npas4l* mutants**

649 Representative confocal images of the tissues adjacent to the pancreas of control  
650 siblings and *npas4l*<sup>-/-</sup> *Tg(ins:Flag-NTR)* zebrafish larvae at 3 dpf after  $\beta$ -cell ablation  
651 by MTZ at 1-2 dpf, displaying cells expressing pancreatic endocrine cell markers Isl1  
652 (**A-B'**), *neurod1* (**E-F'**), *pdx1* (**I-J'**), *mnx1* (**M-N'**), *pcsk1* (**Q-R'**) and *ascl1b* (**U-V'**) in  
653 green, and ectopic  $\beta$ -cells in red. Arrowheads point to ectopic  $\beta$ -cells that expressed  
654 corresponding markers. Arrows point to  $\beta$ -cells that did not express *ascl1b* (**V** and **V'**).  
655 **B'**, **F'**, **J'**, **N'**, **R'** and **V'** are magnified from the areas indicated by the white dashed  
656 square in **B**, **F**, **J**, **N**, **R** and **V** respectively. Quantification of  $\beta$ -cells with or without  
657 corresponding marker expression in the ectopic location (**C**, **G**, **K**, **O**, **S** and **W**) or in  
658 the pancreas (**D**, **H**, **L**, **P**, **T** and **X**) per larva at 3 dpf. \* $P = 0.0310$ , \*\* $P = 0.0039$  and  
659 \*\*\*\* $P < 0.0001$  (Šidák's multiple comparisons test); (**C** and **D**)  $n = 30$  (control) and 31  
660 (*npas4l*<sup>-/-</sup>); (**G** and **H**)  $n = 8$  (control) and 8 (*npas4l*<sup>-/-</sup>); (**K** and **L**)  $n = 25$  (control) and  
661 24 (*npas4l*<sup>-/-</sup>); (**O** and **P**)  $n = 21$  (control) and 23 (*npas4l*<sup>-/-</sup>); (**S** and **T**)  $n = 40$  (control)  
662 and 32 (*npas4l*<sup>-/-</sup>); (**W** and **X**)  $n = 13$  (control) and 13 (*npas4l*<sup>-/-</sup>). Data are represented  
663 as the mean  $\pm$  SEM. Scale bars = 20  $\mu$ m except **B'**, **F'**, **J'**, **N'**, **R'** and **V'** (10  $\mu$ m).  
664 Anatomical axes: D (dorsal), V (ventral), A (anterior) and P (posterior).

665

666 **Figure 3. The ectopic  $\beta$ -cells in *npas4l* mutants and *etv2* morphants were of**  
667 **mesodermal origin**

668 **(A)** Constructs of *-6.35drl:Cre-ER<sup>T2</sup>* (*drl:CreER<sup>T2</sup>*) and *-3.5ubb:loxP-EGFP-loxP-*  
669 *mCherry* (*ubi:Switch*). Upon 4-OHT induction between 10-12 hpf, Cre-recombinase  
670 expressed by the *drl* promoter cleave the *loxP* sites to allow *ubb:mCherry* expression  
671 in the cells that once expressed *drl*. **(B)** Scheme for tracing the mesodermal lineage  
672 of ectopic  $\beta$ -cells in control siblings and *npas4l<sup>-/-</sup>* *Tg(ins:Flag-*  
673 *NTR);Tg(ubi:Switch);Tg(drl:CreER<sup>T2</sup>)* zebrafish larvae. **(C, D, I and J)** Quantification  
674 of the pancreatic or ectopic  $\beta$ -cells with or without mesodermal lineage in *npas4l*  
675 mutants **(C and D)** or *etv2* morpholino (MO)-injected larvae **(I and J)** at 3 dpf. \**P* =  
676 0.0227 and \*\*\*\**P* < 0.0001 (Šidák's multiple comparisons test); **(C and D)** *n* = 21  
677 (control) and 14 (*npas4l<sup>-/-</sup>*) or **(I and J)** *n* = 21 (control) and 23 (*etv2* MO). Data are  
678 represented as the mean  $\pm$  SEM. **(E-H'''' and K-L''')** Representative confocal images  
679 of pancreatic **(E and F)** or ectopic  $\beta$ -cells **(G and H)** of control siblings and *npas4l<sup>-/-</sup>*, or  
680 ectopic  $\beta$ -cells in control or *etv2* MO-injected **(K and L)** *Tg(ins:Flag-*  
681 *NTR);Tg(ubi:Switch);Tg(drl:CreER<sup>T2</sup>)* zebrafish larvae at 3 dpf after  $\beta$ -cell ablation by  
682 MTZ at 1-2 dpf, displaying  $\beta$ -cells in cyan and lineage-traced cells derived from *drl-*  
683 expressing mesodermal cells in red. Pancreata are outlined by the solid white lines **(E**  
684 **and F)**. Arrowheads point to ectopic  $\beta$ -cells derived from the mesoderm **(H-H'''' and L-**  
685 **L''')**. Selected areas in dashed squares in **H** and **L** are magnified in split **(H', H'', L'**  
686 **and L''')** and merged **(H'''' and L''')** channels, respectively. Scale bars = 20  $\mu$ m **(E-H,**  
687 **K and L)** or 10  $\mu$ m **(H'-H'''' and L'-L''')**. Anatomical axes: D (dorsal), V (ventral), A  
688 (anterior) and P (posterior).

689

690 **Figure 4. The ectopic  $\beta$ -cells in *etv2* morphants derived from the *etv2*-expressing**  
691 **mesodermal lineage**

692 (A) Constructs of *-2.3etv2:iCre (etv2:iCre)* and *-3.5ubb:loxP-EGFP-loxP-mCherry*  
693 (*ubi:Switch*). (B and C) Quantification of the pancreatic or ectopic  $\beta$ -cells with or  
694 without *etv2*-positive mesodermal origin in control or *etv2* morpholino (MO)-injected  
695 larvae at 3 dpf. \* $P = 0.0169$ , \*\*\* $P = 0.0002$  and \*\*\*\* $P < 0.0001$  (Šidák's multiple  
696 comparisons test);  $n = 33$  (control) and 30 (*etv2* MO). Data are represented as the  
697 mean  $\pm$  SEM. (D-E'') Representative confocal images of ectopic  $\beta$ -cells and *etv2*-  
698 positive lineage-traced cells in control or *etv2* MO-injected *Tg(ins:Flag-*  
699 *NTR);Tg(ubi:Switch);Tg(etv2:iCre)* zebrafish larvae at 3 dpf after  $\beta$ -cell ablation by  
700 MTZ at 1-2 dpf, displaying  $\beta$ -cells in cyan and lineage-traced cells derived from *etv2*-  
701 expressing mesodermal cells in red. The selected area in a dashed square in E is  
702 magnified in split (E' and E'') and merged (E''') channels, respectively. (F) Constructs  
703 of *-2.3etv2:iCre (etv2:iCre)* and *ins:loxP-mCherry-loxP-H2B-GFP (ins:CSH)*. (G-G''')  
704 Representative confocal images of ectopic  $\beta$ -cells derived from the *etv2*-expressing  
705 lineage in *etv2* MO-injected *Tg(ins:Flag-NTR);Tg(ins:CSH);Tg(etv2:iCre)* zebrafish  
706 larvae at 3 dpf after  $\beta$ -cell ablation by MTZ at 1-2 dpf, displaying  $\beta$ -cells in magenta  
707 and lineage-traced cells derived from *etv2*-expressing mesodermal cells in nuclear  
708 green. The selected area in a dashed square in G is magnified in split (G' and G'') and  
709 merged (G''') channels, respectively. Scale bars = 20  $\mu\text{m}$  (D, E and G) or 10  $\mu\text{m}$  (E'-  
710 E''' and G'-G'''). Anatomical axes: D (dorsal), V (ventral), A (anterior) and P (posterior).

711

712 **Figure Supplements Legends**

713 **Figure 1-figure supplement 1. Mutation of *npas4l* suppressed the development**  
714 **of exocrine pancreas**

715 (A and B) Representative image projections of the pancreas in control siblings and  
716 *npas4l*<sup>-/-</sup> *Tg(ptf1a:GFP)* larvae, without carrying the *ins:Flag-NTR* transgene, i.e.  
717 during regular development. These larvae were controls for the  $\beta$ -cell ablation, i.e. still  
718 treated with MTZ from 1-2 dpf (not leading to  $\beta$ -cell ablation due to the absence of  
719 *ins:Flag-NTR*). Insulin-expressing  $\beta$ -cells are displayed in red and exocrine pancreas  
720 in green. Scale bars = 20  $\mu$ m.

721

722 **Figure 1-figure supplement 2. Mutation of *npas4l* mildly induced ectopic *sst2*-**  
723 **expressing  $\delta$ -cells**

724 (A-D) Representative images of pancreatic  $\delta$ -cells (A and B) and ectopic  $\delta$ -cells (C  
725 and D) of control siblings and *npas4l*<sup>-/-</sup> *Tg(sst2:NTR);Tg(sst2:RFP)* zebrafish larvae at  
726 3 dpf after  $\delta$ -cell ablation by MTZ at 1-2 dpf;  $\delta$ -cells are shown in red. Solid white lines  
727 outline the pancreata. (E and F) Quantification of the *sst2:RFP*<sup>+</sup>  $\delta$ -cells in the pancreas  
728 (E) or in the mesenchyme outside the pancreas (F) per larva at 3 dpf. \*  $P = 0.0479$   
729 (Mann-Whitney test);  $n = 18$  (control) and  $n = 8$  (*npas4l*<sup>-/-</sup>). Data are represented as  
730 the mean  $\pm$  SEM. Scale bars = 20  $\mu$ m. Anatomical axes: D (dorsal), V (ventral), A  
731 (anterior) and P (posterior).

732

733 **Figure 2-figure supplement 1. Percentages of pancreatic or ectopic cells co-**  
734 **expressing insulin and corresponding marker gene or protein in *npas4l***  
735 **mutants**

736

737 **Figure 2-figure supplement 2. Mutation of *npas4l* inhibited *pdx1*-expressing**  
738 **pancreatic duct formation**

739 **(A-D)** Representative image projections of the pancreas and the surrounding tissues  
740 in control siblings and *npas4l*<sup>-/-</sup> *Tg(pdx1:GFP)* zebrafish larvae without **(A and B)** or  
741 with **(C and D)** *ins:Flag-NTR* expression at 3 dpf after treatment with MTZ at 1-2 dpf.  
742 Hence **A** and **B** were  $\beta$ -cell ablation controls while the  $\beta$ -cells in **C** and **D** had been  
743 ablated. Insulin-expressing  $\beta$ -cells are displayed in red and *pdx1*-expressing cells  
744 (including pancreatic ductal cells and upper intestine) in green. The dashed rectangle  
745 indicates that the ectopic  $\beta$ -cells were distant from the *pdx1*-expressing pancreatic  
746 ducts. Scale bars = 20  $\mu$ m.

747

748 **Figure 3-figure supplement 1. Cell population with reduced *npas4l* expression**  
749 **remains in the lateral plate mesoderm before  $\beta$ -cell ablation**

750 **(A and B)** Representative images of *in situ* hybridization against *npas4l* expression in  
751 control siblings and *npas4l*<sup>-/-</sup> zebrafish embryos at 20 hpf after a 45-minute incubation  
752 to develop the expression signal. Inset **B'** displays a representative *npas4l*<sup>-/-</sup> zebrafish  
753 embryo incubated overnight to further develop the signal. Red arrowheads point to  
754 lateral plate mesoderm expressing *npas4l*.

755

756 **Figure 3-figure supplement 2. The *npas4l* mutant did not display altered**  
757 **expression of *drl* in the lateral plate mesoderm**

758 **(A and B)** Representative images of *in situ* hybridization against *drl* expression in  
759 control siblings and *npas4l*<sup>-/-</sup> zebrafish embryos at 10 hpf.

760 **Figure 4-figure supplement 1. Npas4/Etv2 restricts the plasticity of the**  
761 **mesoderm**

762 Mesoderm and endoderm normally follow Waddington's landscape model to further  
763 differentiate into cells with mesodermal fates and endodermal fates, respectively,  
764 during development. However, mutating *npas4l* or knocking down *etv2* not only  
765 abolishes the endothelial specification but also induces plasticity of mesodermal cells  
766 to enable their differentiation to  $\beta$ -cells,  $\delta$ -cells and perhaps other endodermal  
767 pancreatic cells across the germ layer border.

768



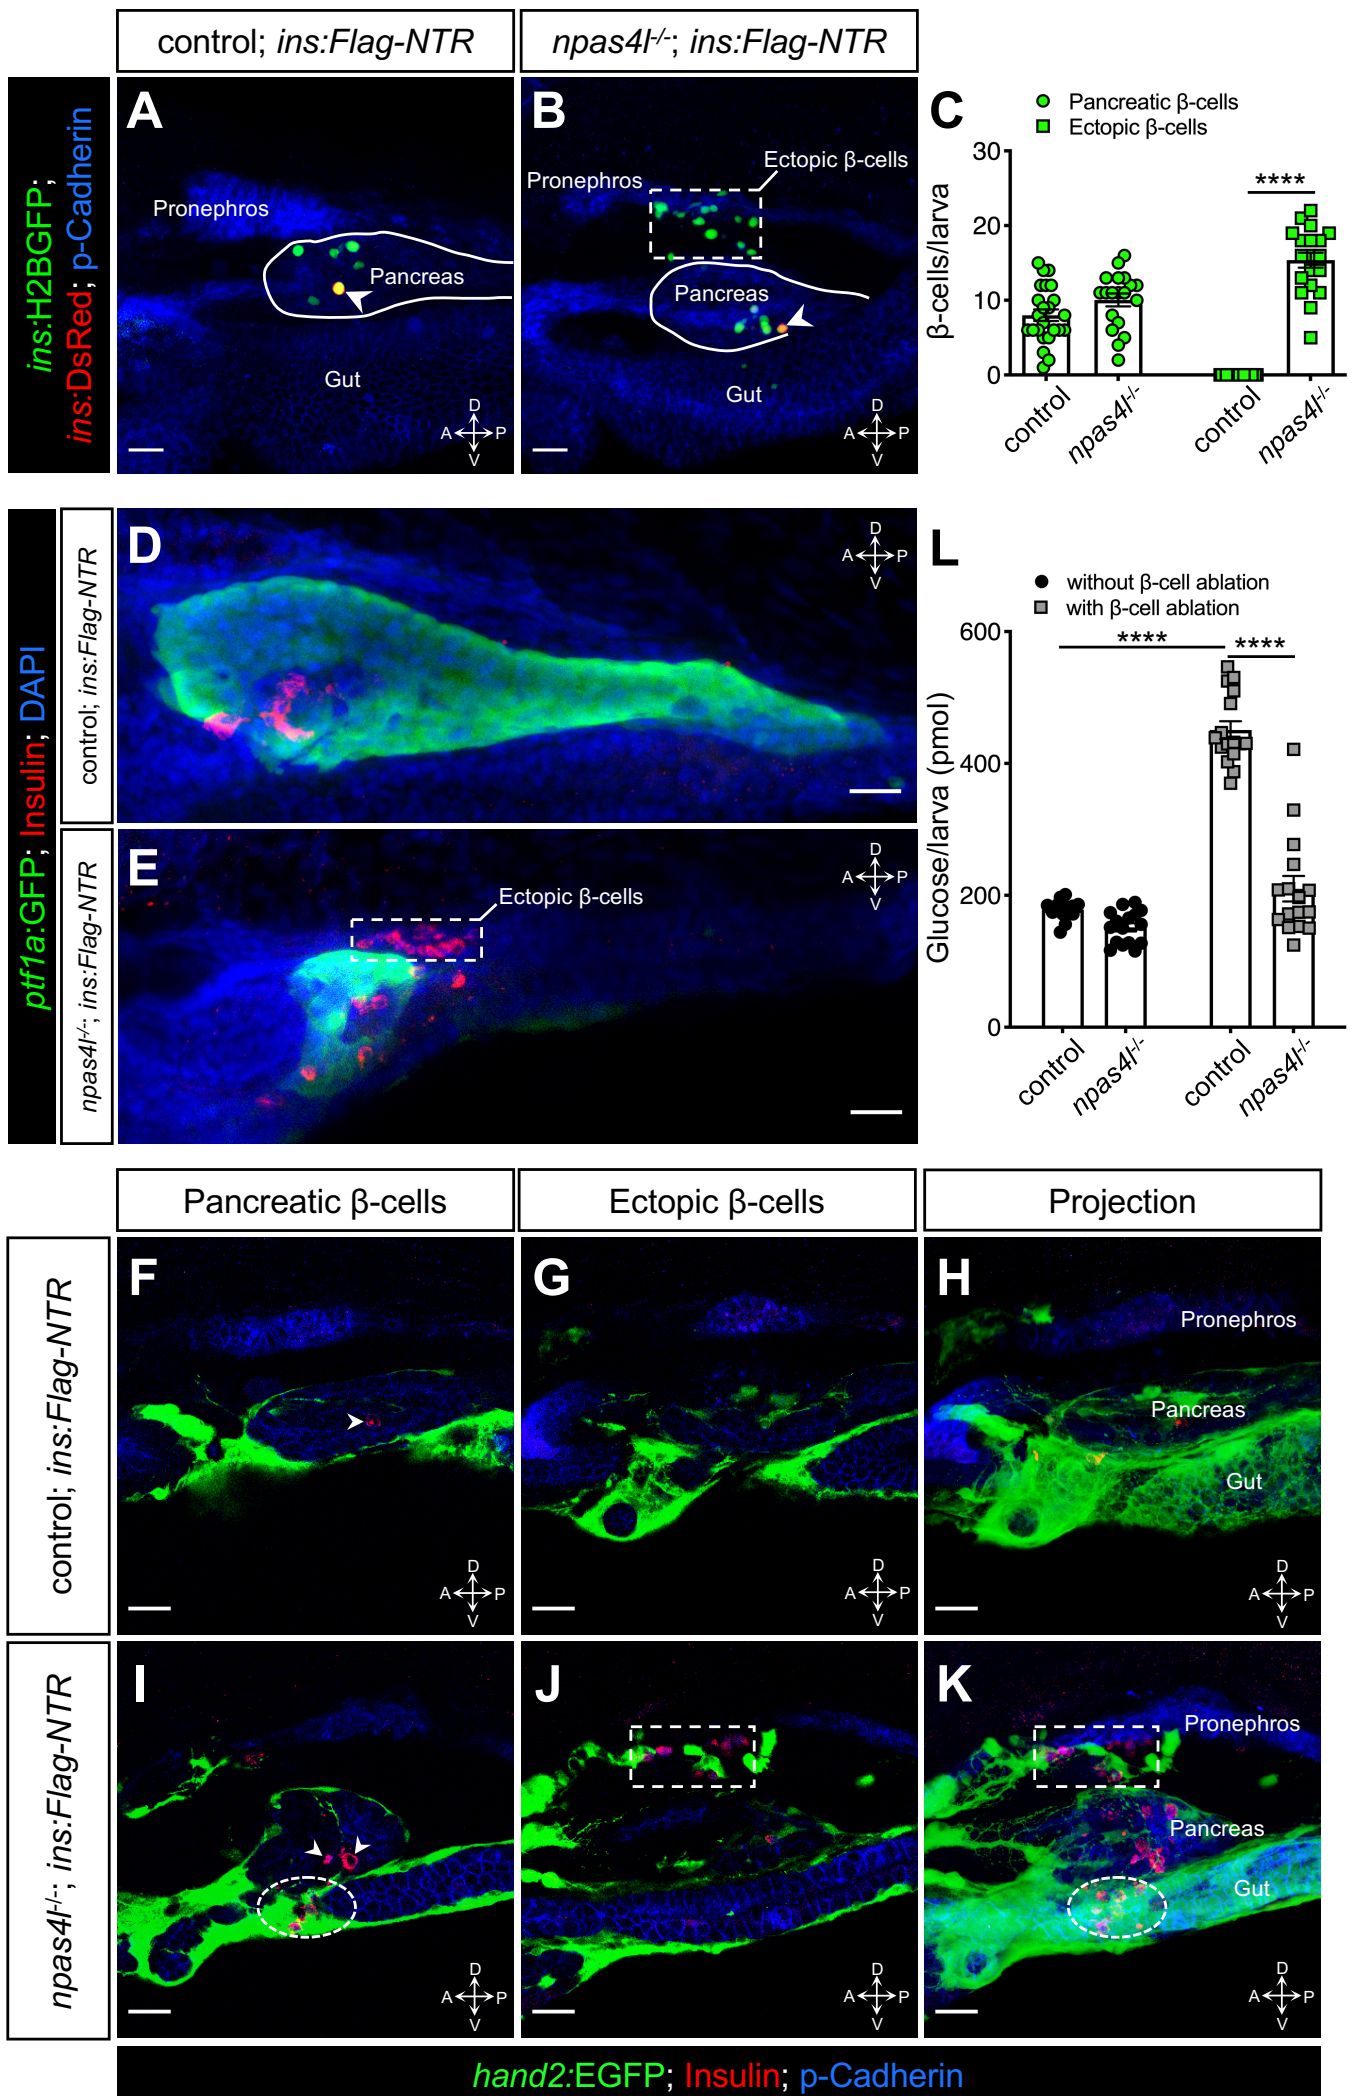

Figure 1 with 2 supplements



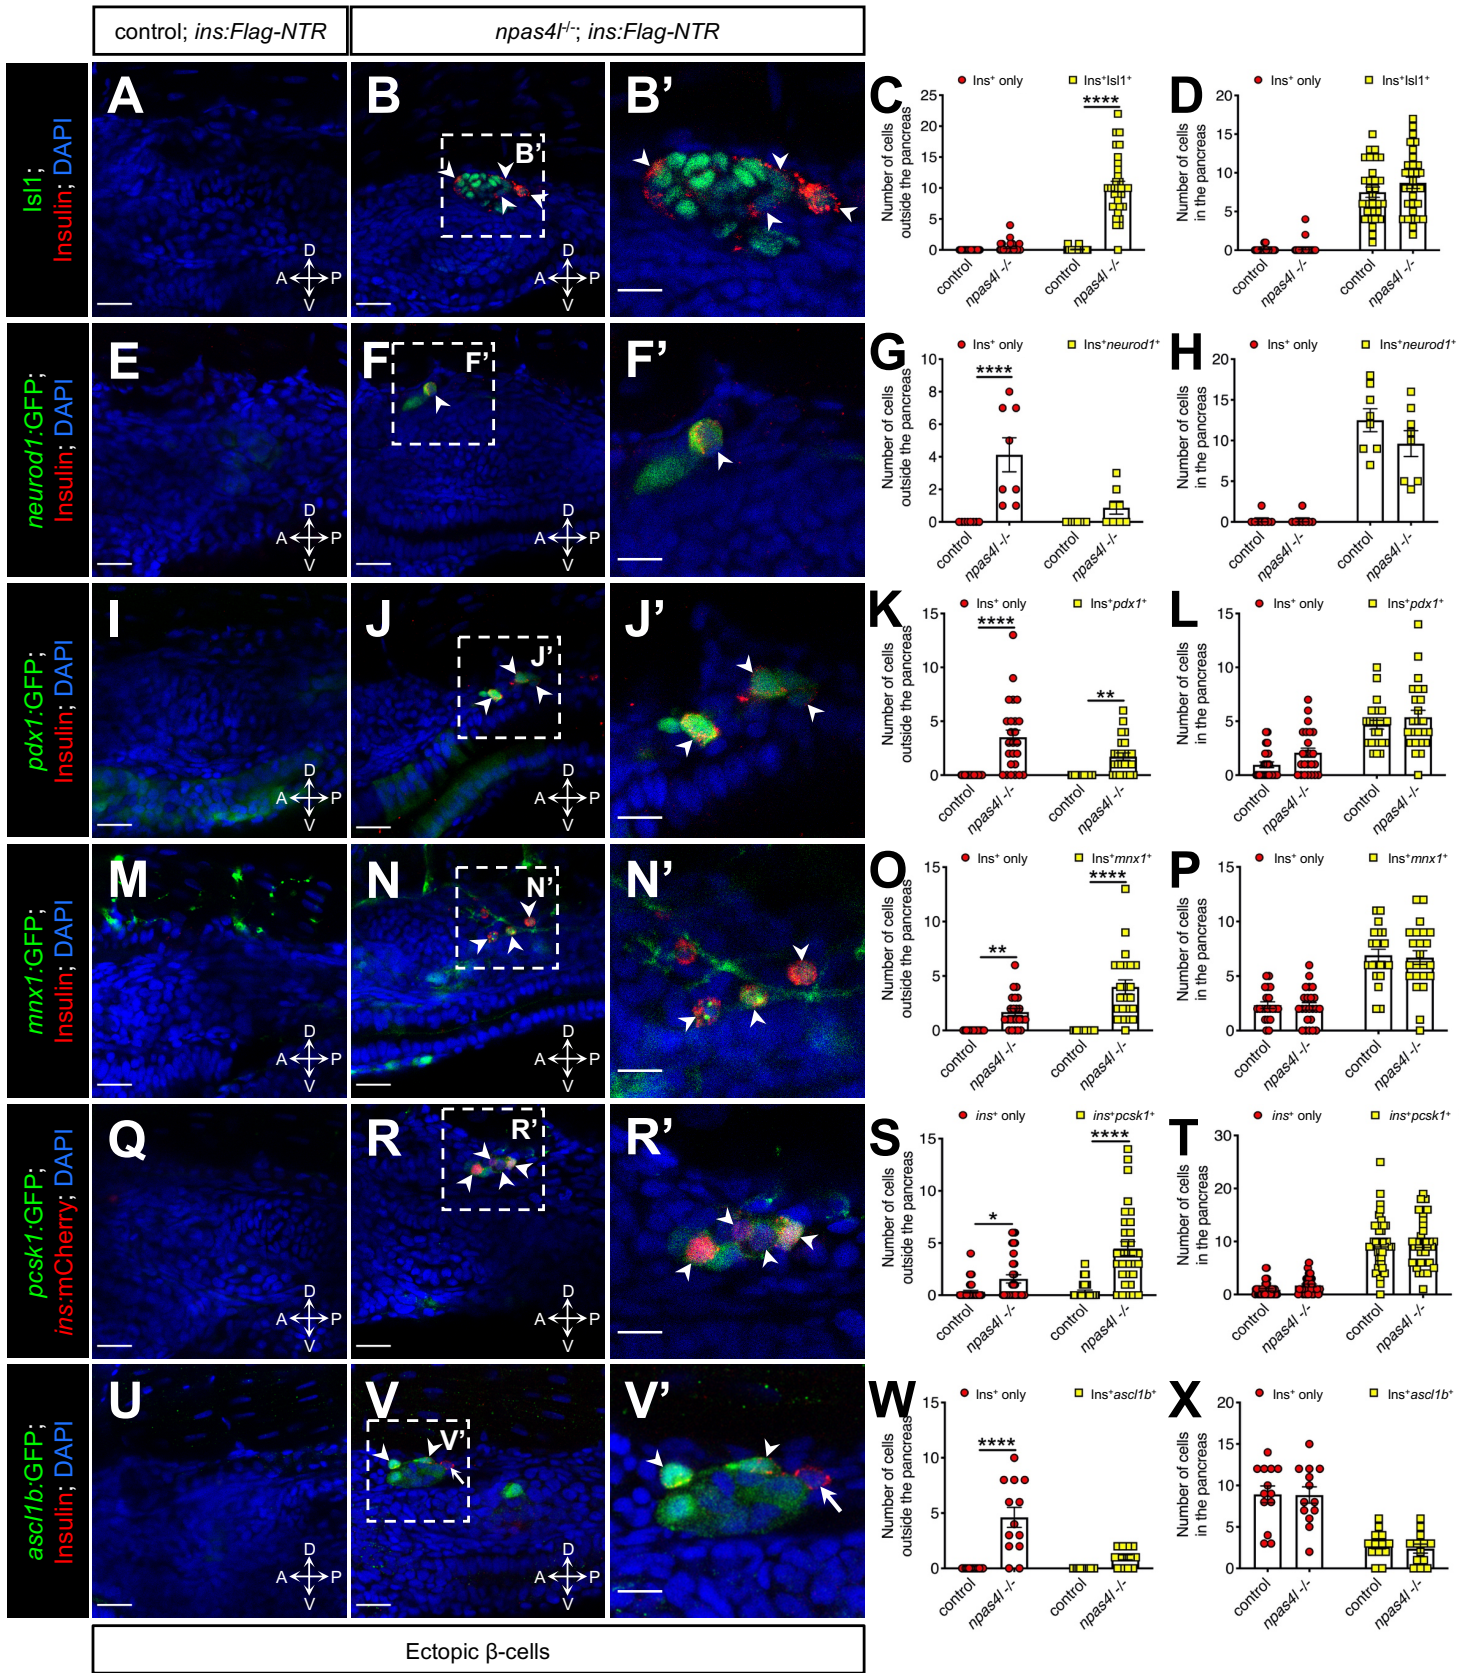

Figure 2 with 2 supplements

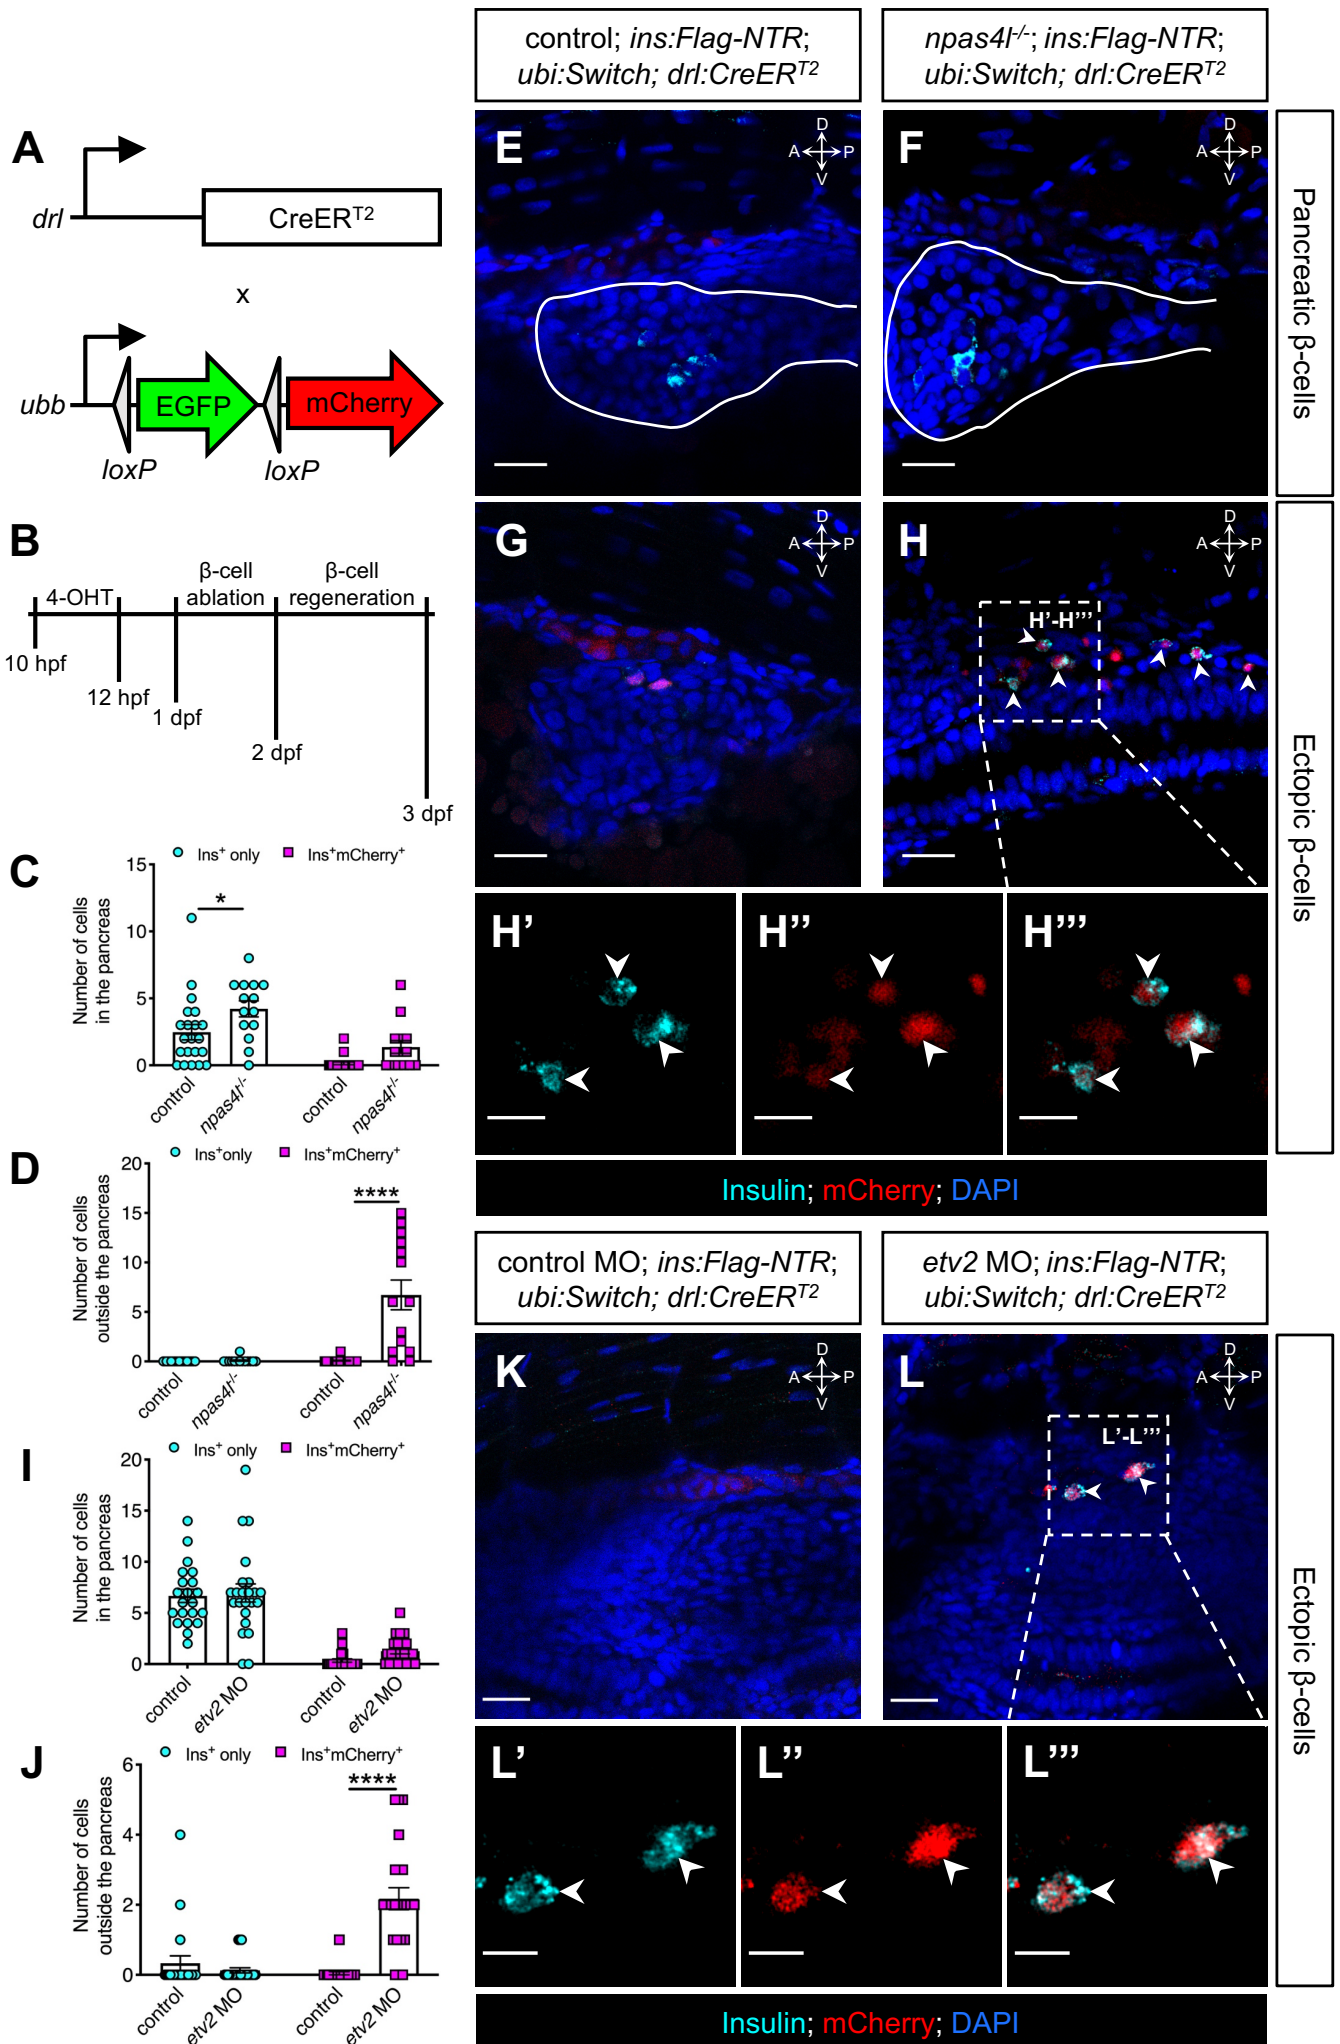



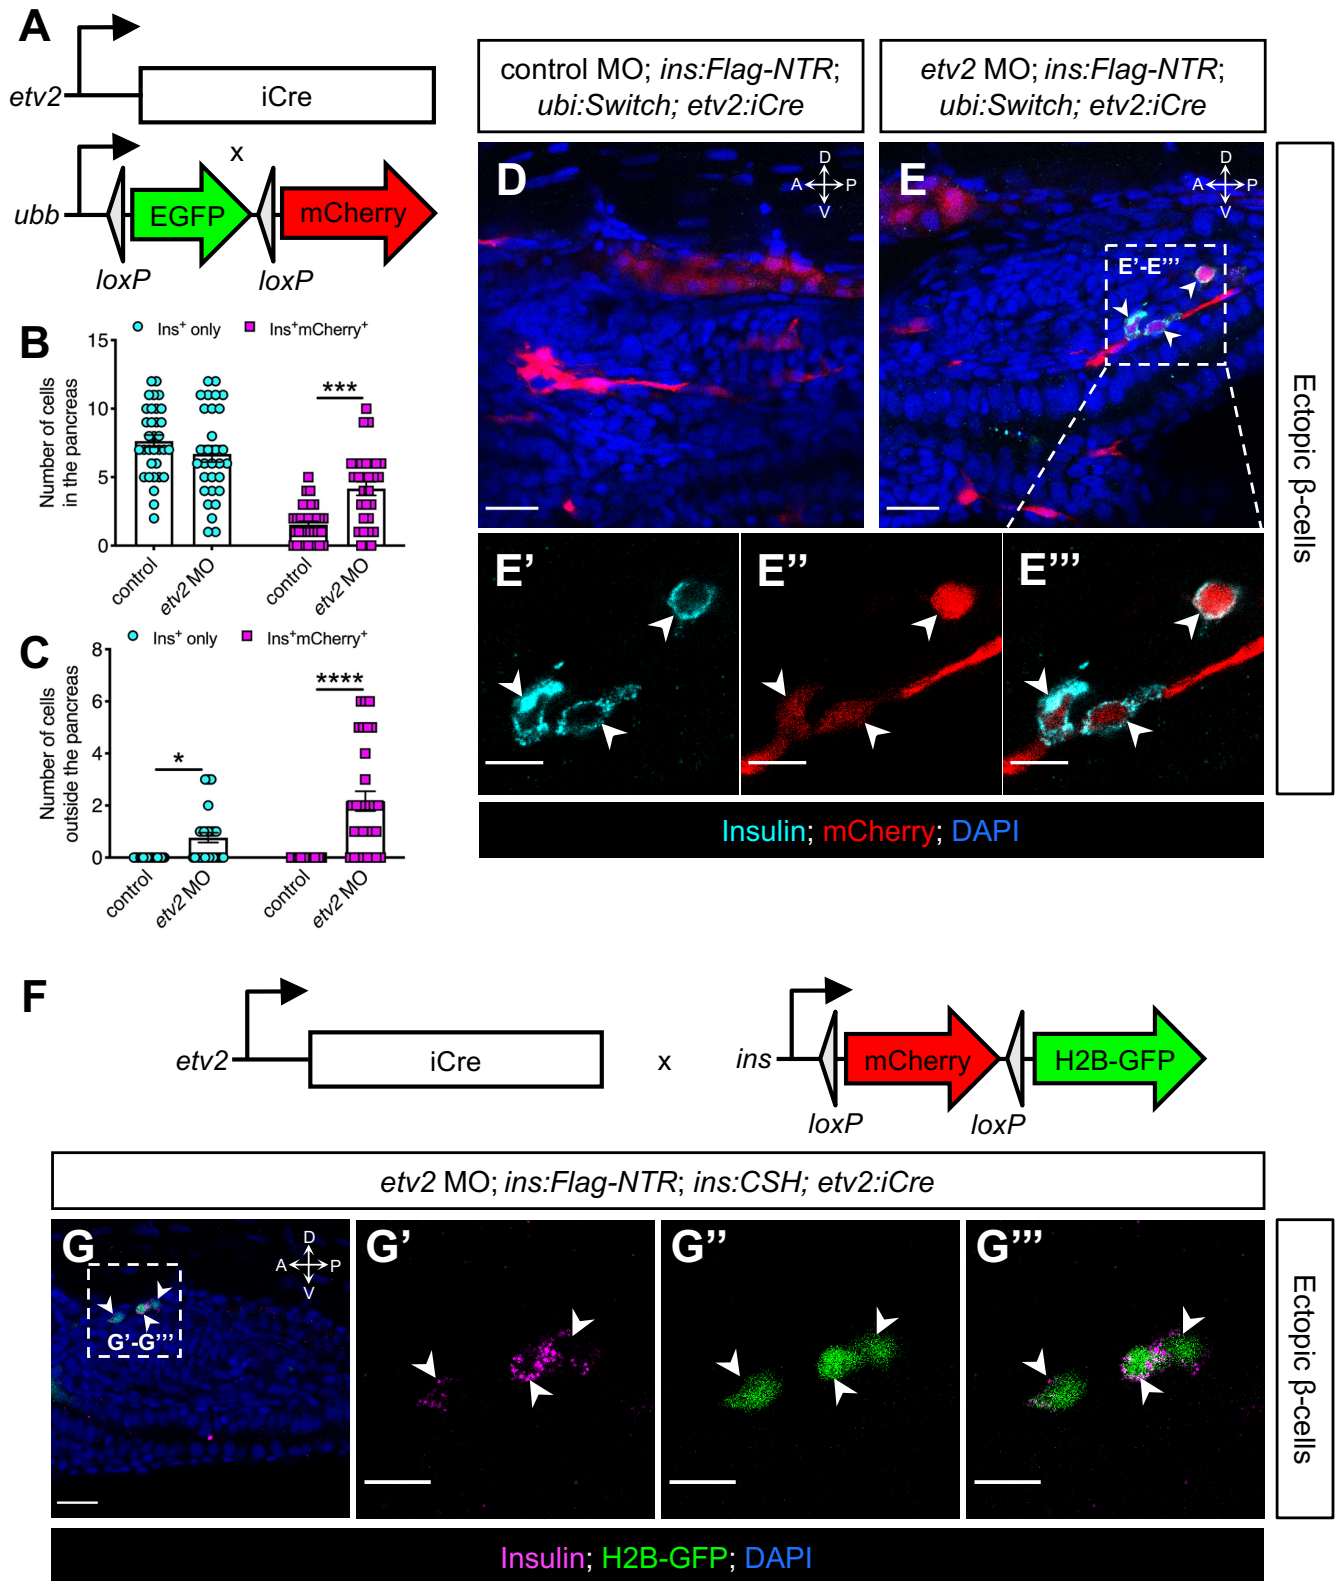

Figure 4 with 1 supplement

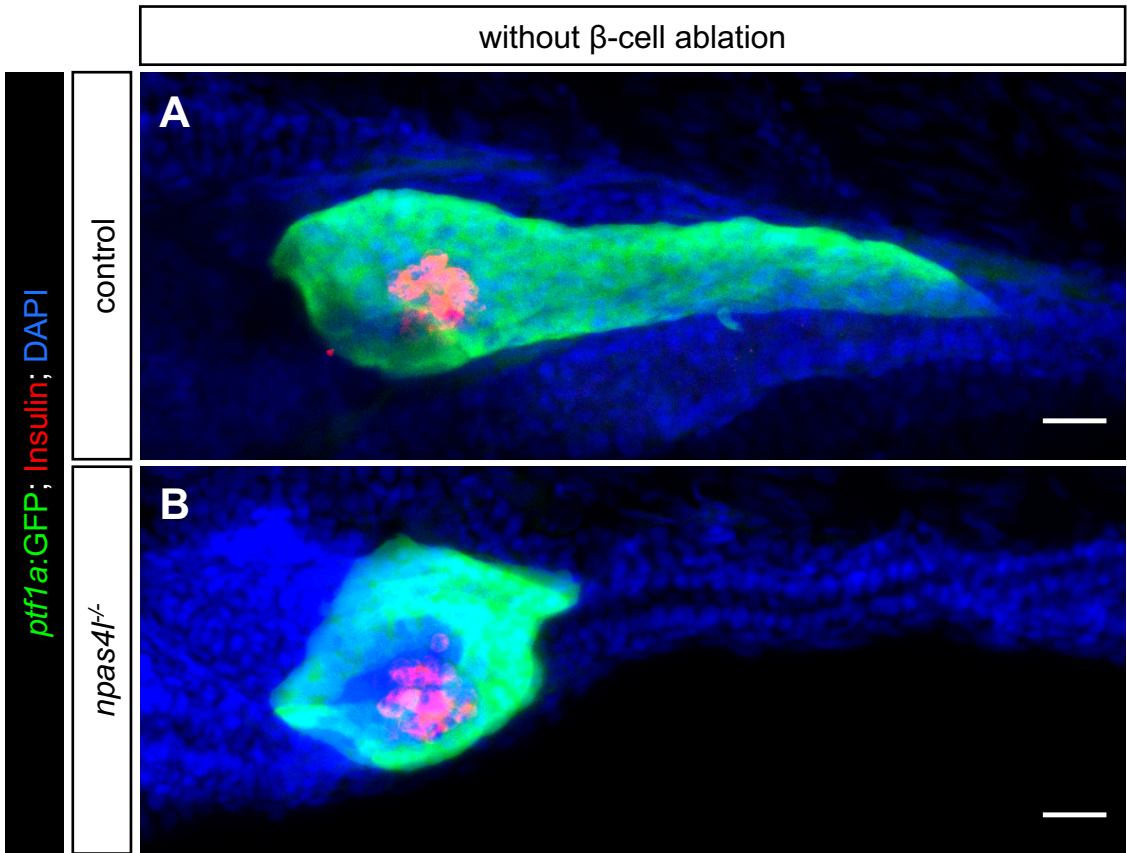

Figure 1-figure supplement 1

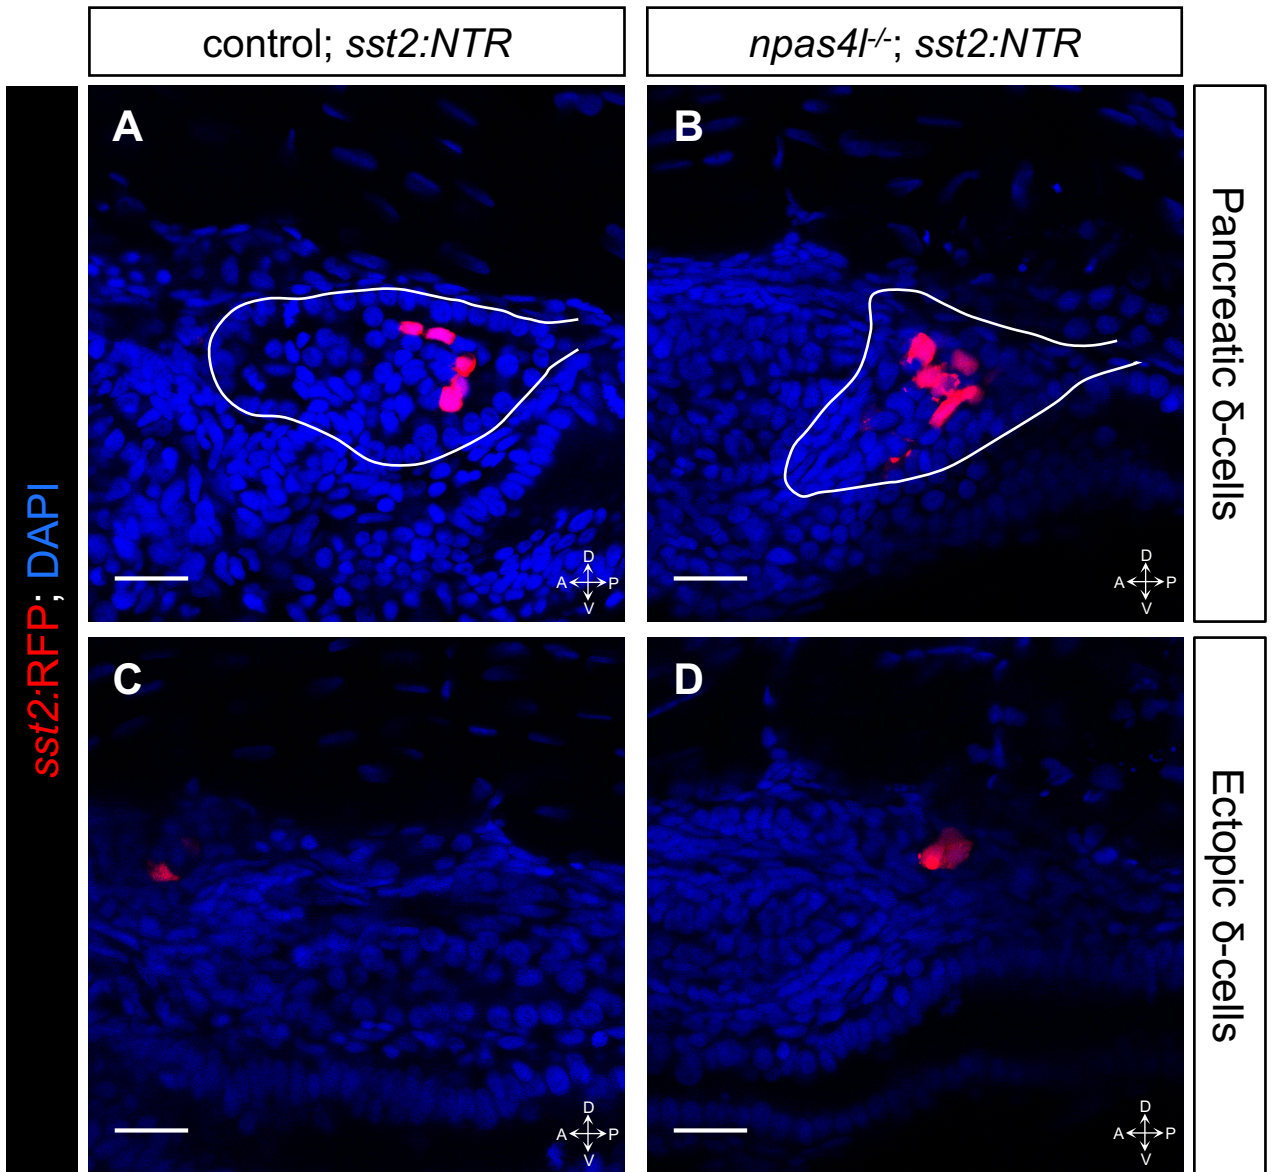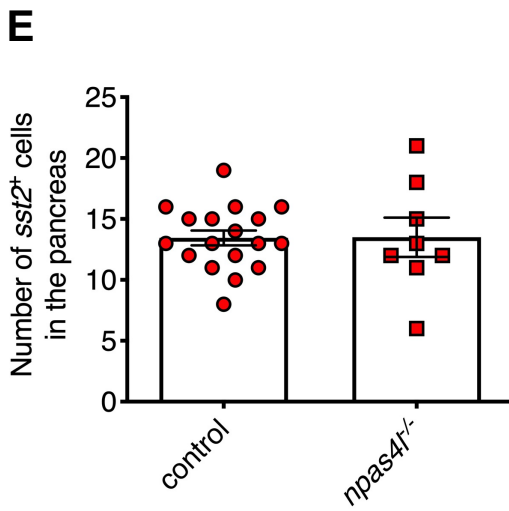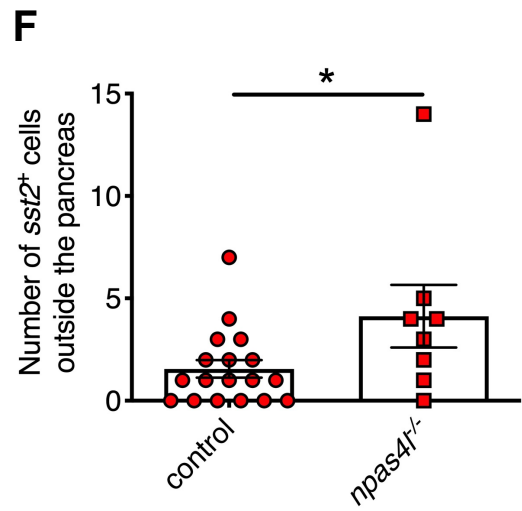

Figure 1-figure supplement 2

| <b>Marker gene/protein</b> | <b>Pancreatic co-expression (%)</b> | <b>Ectopic co-expression (%)</b> |
|----------------------------|-------------------------------------|----------------------------------|
| Isl1                       | 97.9                                | 96.8                             |
| <i>neurod1</i>             | 97.5                                | 17.5                             |
| <i>pdx1</i>                | 72.1                                | 32.8                             |
| <i>mnx1</i>                | 75.3                                | 70.2                             |
| <i>pcsk1</i>               | 85.1                                | 74.1                             |
| <i>ascl1b</i>              | 21.2                                | 17.8                             |

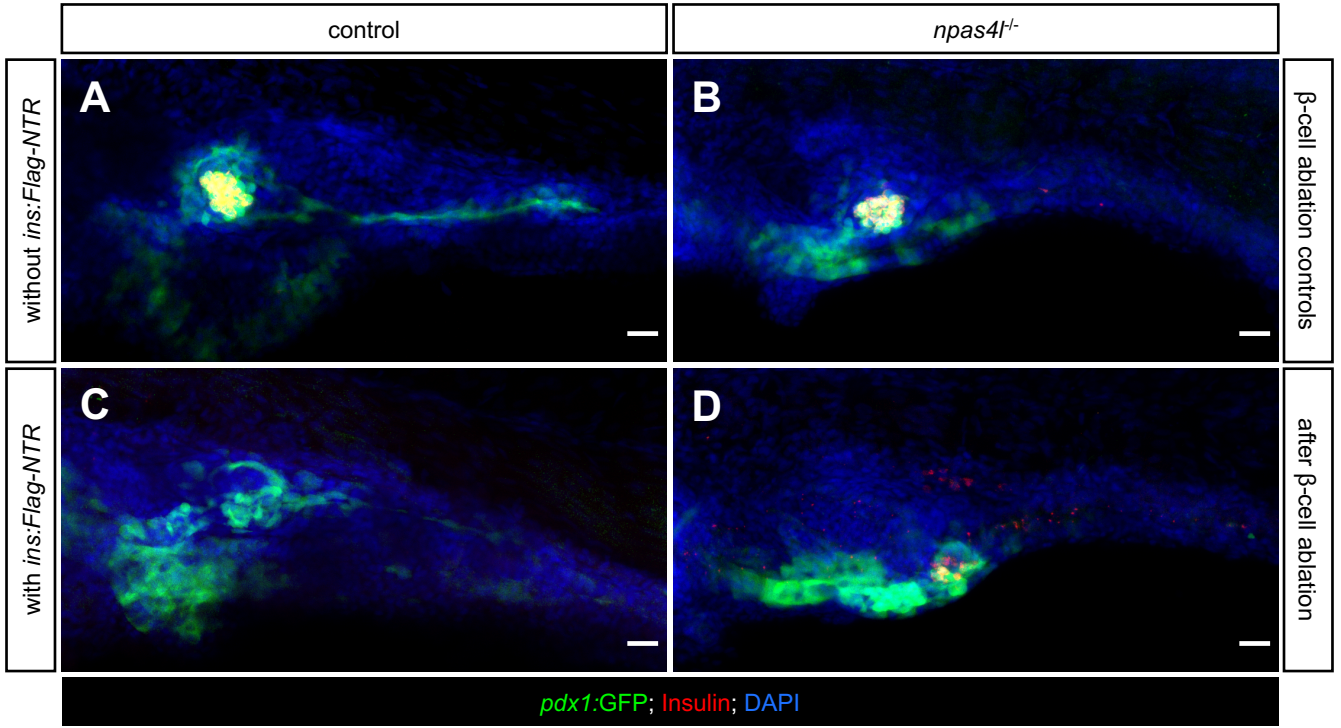

Figure 2-figure supplement 2



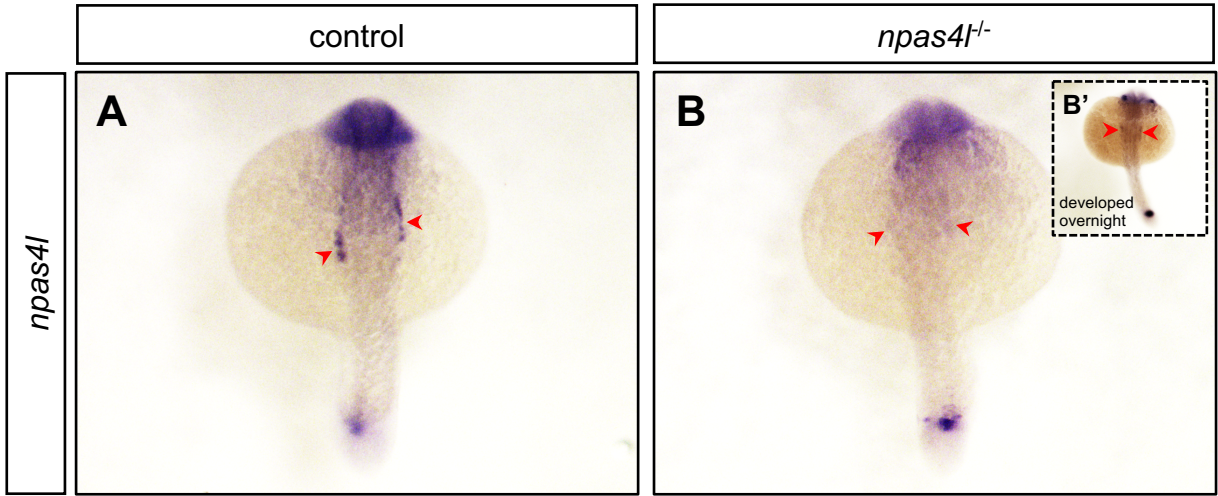

Figure 3-figure supplement 1



control

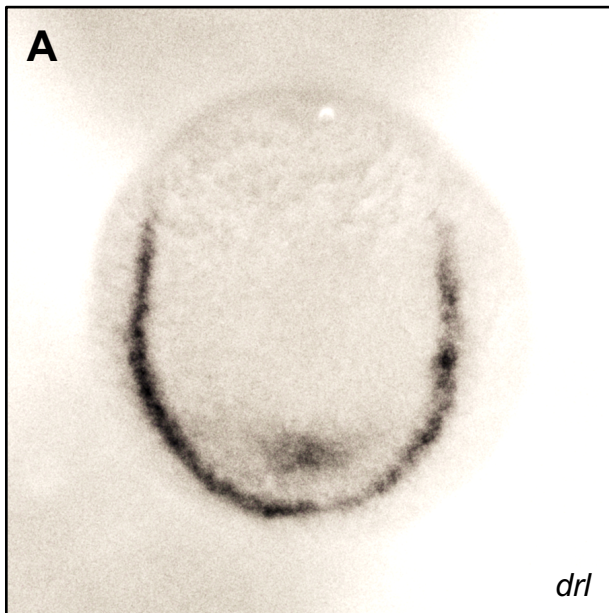

*npas4l<sup>-/-</sup>*

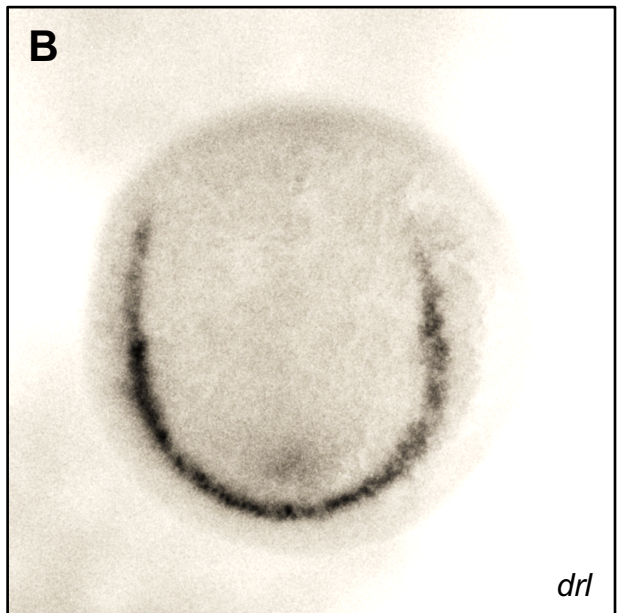

Figure 3-figure supplement 2

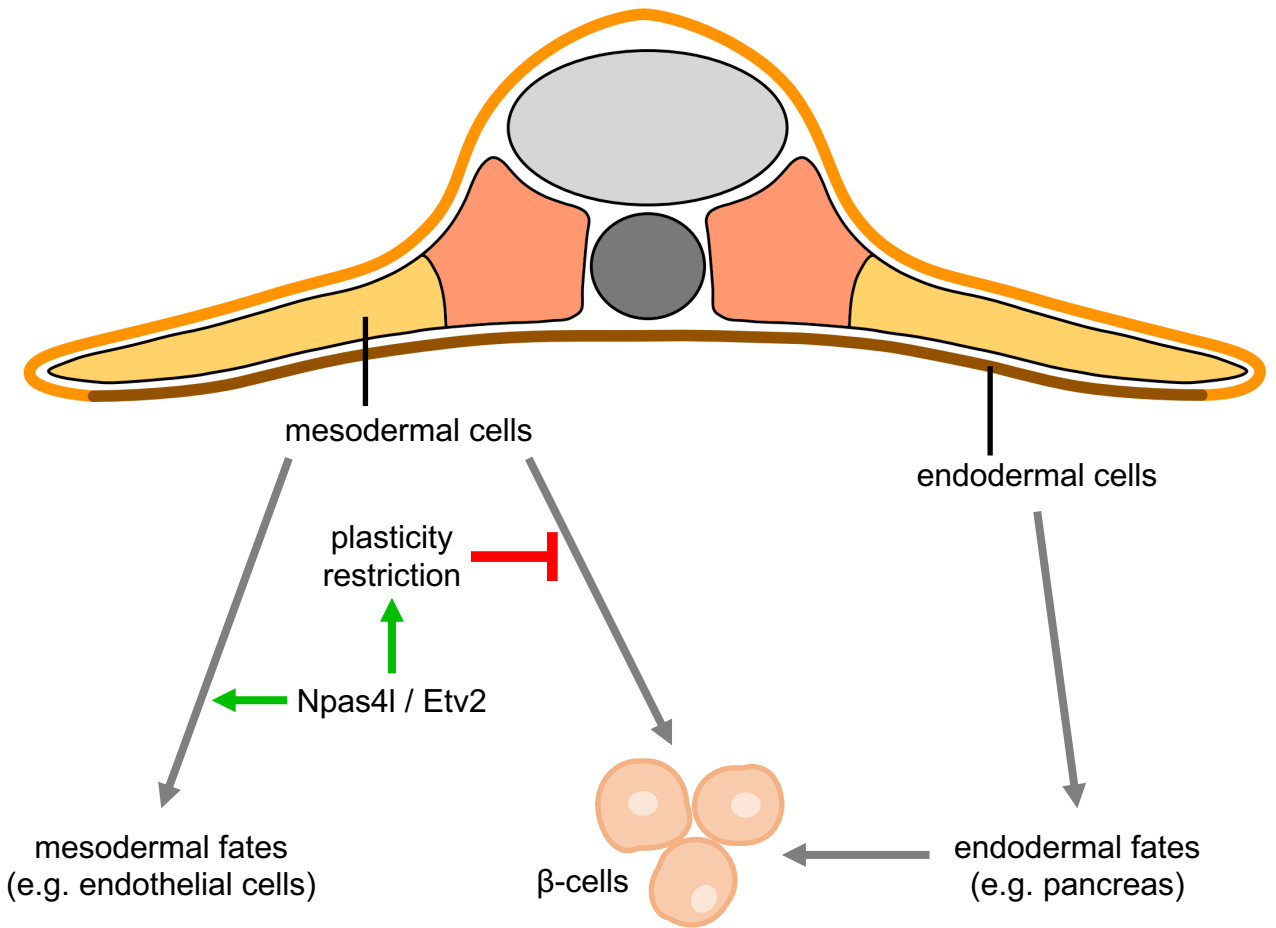

Figure 4-figure supplement 1
